# Supplementary material for: Whole-Genome Resequencing of Ujimqin Sheep Identifies Genes Associated with Vertebral Number
Source: Animals (Basel). 2024 Feb 21;14(5):677. doi: 10.3390/ani14050677 (PMC10931107; doi:10.3390/ani14050677)
Supplement: Supplementary file 1 [file animals-14-00677-s001.zip]

Archive with 11 entries (11 files):
- Figure S1.pdf
- Table S1.xls
- Table S10.xls
- Table S2.xls
- Table S3.xls
- Table S4.xls
- Table S5.xls
- Table S6.xls
- Table S7.xlsx
- Table S8.xlsx
- Table S9.xlsx
