# Supplementary material for: Whole-Genome Resequencing of Ujimqin Sheep Identifies Genes Associated with Vertebral Number
Source: Animals (Basel). 2024 Feb 21;14(5):677. doi: 10.3390/ani14050677 (PMC10931107; doi:10.3390/ani14050677)
Supplement: Supplementary file 1 [file animals-14-00677-s001.zip › Table S1.xls]

## Sheet: Sheet1
Table S1. Sample list of sheep with more spinal vertebrae for selective-sweep analysis
Sample ID
B151126
B1644
B173103
B173130
B173137
B174342
B181302
C143081
C150692
C151003
C151059
C152580
C154336
C162208
C162400
D10000
D151010
D151069
D151101
T2010059079
D151254
D152211
D160964
