# Supplementary material for: Whole-Genome Resequencing of Ujimqin Sheep Identifies Genes Associated with Vertebral Number
Source: Animals (Basel). 2024 Feb 21;14(5):677. doi: 10.3390/ani14050677 (PMC10931107; doi:10.3390/ani14050677)
Supplement: Supplementary file 1 [file animals-14-00677-s001.zip › Table S2.xls]

## Sheet: Sheet1
Table S2. The set of primers used to amplify the genomic DNA
Site	Primer	Length
SNP1(Chr7:89387652 G>A)	F:5'GGGCCTGTGCTAAATTGTTTCT3'	82bp
	R:5'CTAAGAACCAACCTGCTTGCC3'
SNP2(Chr7:89383419 G>C)	F:5'CTACTCCCAGCAGCACTGAC3'	152bp
	R:5'AACGGTTTGTGAGAGGAGGG3'
SNP3(Chr7:89393414 C>T)	F:5'CAGCCTACCGACTTCAGCAT3'	319bp
	R:5'TGTGTAATCAACACCCCGCA3'
