# Supplementary material for: Whole-Genome Resequencing of Ujimqin Sheep Identifies Genes Associated with Vertebral Number
Source: Animals (Basel). 2024 Feb 21;14(5):677. doi: 10.3390/ani14050677 (PMC10931107; doi:10.3390/ani14050677)
Supplement: Supplementary file 1 [file animals-14-00677-s001.zip › Table S3.xls]

## Sheet: Sheet1
Table S3. The PCR products
site	product	product length
SNP1(Chr7:89387652, G>A)	GGGCCTGTGC TAAATTGTTT CTGGATTTTG CAACCTCTGC TCATGAAGCT CTGGGCCCTG GGGCAAGCAG GTTGGTTCTT AG	82bp
SNP2(Chr7:89383419, G>C)	CTACTCCCAG CAGCACTGAC AGTGCTTATC TTCCCCTCAT CTCCTCCCTT CTCGGACCCC AGGGGCCCGG GAGAGCCAGC AACAGAGCCA GCAGATGCAG CTTTCCTCCT CGAGCGGGTC TGCATCTACG CCCCCTCCTC TCACAAACCG TT	152bp
SNP3(Chr7:89393414, C>T)	CAGCCTACCG ACTTCAGCAT TTGTAAAACA TTCTTTTTGT GTGGCCTCAG CCCCAACCCA CAACAGGTGT AGATAAGTTT AGTCACTGCT CTCTAAGGCT CCGTTGTTCT CTTAGGTTTCT CTCTGCTTC TCTTCTTCAG ACCCAGGTTA GATGTGCAAT TTCTCCGGCG GTTCCTGCAGA TACAGAAGG TTTTGTTTCC CTCTTGGTCA TCACAGAATG CCTTGATGTT CCTGACCCTT TTGTGTGTGG CCCTACTGGG TGAGTGAATG AGCCCAAGCT CGTGGGGTCC TTTTCCTTCT GCGGGGTGTT GATTACACA	319bp
