# Supplementary material for: Whole-Genome Resequencing of Ujimqin Sheep Identifies Genes Associated with Vertebral Number
Source: Animals (Basel). 2024 Feb 21;14(5):677. doi: 10.3390/ani14050677 (PMC10931107; doi:10.3390/ani14050677)
Supplement: Supplementary file 1 [file animals-14-00677-s001.zip › Table S4.xls]

## Sheet: Sheet1
Table S4. Statistics for the comparison of the read results
Sample name	Total reads	Raw Base(bp)	Total mapped reads	Mapping rate(%)
A151139	219672062	32950809300	219443827	99.9
A152528	209233378	31385006700	208997828	99.89
A152567	252924444	37938666600	252275062	99.74
A152572	182415606	27362340900	182117800	99.84
A154368	240067112	36010066800	239297531	99.68
A162475	182986028	27447904200	182769134	99.88
A164219	238277326	35741598900	238008084	99.89
A173181	273965146	41094771900	273556771	99.85
A173184	463818764	69572814600	462952048	99.81
A173195	328295390	49244308500	327544026	99.77
A182703	306192732	45928909800	305835214	99.88
A182744	294937664	44240649600	294654138	99.9
A182753	267786582	40167987300	267593232	99.93
A182773	201275646	30191346900	201049986	99.89
A182799	222598702	33389805300	222272044	99.85
A184287	270908282	40636242300	270606846	99.89
A19002	233576426	35036463900	233265855	99.87
A19003	376378812	56456821800	375613653	99.8
A19022	182699404	27404910600	182326536	99.8
A19050	216191822	32428773300	216057206	99.94
A19095	336860442	50529066300	336596695	99.92
A19110	281132568	42169885200	280405391	99.74
A19117	274829810	41224471500	274432588	99.86
B151126	309666092	46449913800	309307413	99.88
B160991	257822644	38673396600	257625010	99.92
B1644	244715838	36707375700	244454244	99.89
B173103	284636334	42695450100	283944276	99.76
B173130	307618238	46142735700	303281252	98.59
B173137	267247786	40087167900	266718590	99.8
B174342	254975482	38246322300	254437682	99.79
B181302	264517172	39677575800	263740869	99.71
B182706	236354476	35453171400	235978179	99.84
B182761	200068880	30010332000	199879808	99.91
B182772	269193226	40378983900	268800702	99.85
B182784	272557542	40883631300	272266896	99.89
B182790	249411728	37411759200	249059341	99.86
B184286	282410316	42361547400	280106393	99.18
B1871	257189196	38578379400	256809552	99.85
B19012	245128886	36769332900	244908333	99.91
B19039	273716538	41057480700	272645369	99.61
B19044	336786920	50518038000	335523398	99.62
B19075	272521250	40878187500	272185263	99.88
B19082	261263880	39189582000	260859129	99.85
B19108	304608366	45691254900	304188489	99.86
B19112	261837300	39275595000	261447207	99.85
B19118	207362040	31104306000	207164353	99.9
C143081	287709994	43156499100	287327553	99.87
C150692	274816588	41222488200	274518652	99.89
C151003	299363938	44904590700	299097089	99.91
C151059	297177090	44576563500	296846411	99.89
C152580	323557254	48533588100	323307327	99.92
C154336	285518594	42827789100	285254759	99.91
C162208	299834184	44975127600	299447772	99.87
C162400	314206344	47130951600	313832023	99.88
C16407	291219146	43682871900	290950985	99.91
C164316	283335122	42500268300	283041272	99.9
C164331	323394354	48509153100	323097402	99.91
C164366	310093596	46514039400	309732430	99.88
C172569	309013788	46352068200	308586348	99.86
C173019	323762780	48564417000	323401994	99.89
C173139	314312896	47146934400	313861352	99.86
C173179	358786264	53817939600	357798390	99.72
C174323	291767980	43765197000	291266957	99.83
C174350	329757248	49463587200	329394433	99.89
C181311	271433048	40714957200	271104769	99.88
C181368	295706420	44355963000	295175922	99.82
C182741	322668508	48400276200	321729143	99.71
C182792	293906694	44086004100	293533477	99.87
C19058	251414382	37712157300	250731182	99.73
C19076	302076448	45311467200	301282930	99.74
C19081	257963194	38694479100	257605999	99.86
C19092	352847110	52927066500	352368340	99.86
D10000	196100914	29415137100	195781996	99.84
D151010	317846926	47677038900	317636550	99.93
D151069	184431710	27664756500	184066144	99.8
D151101	324793294	48718994100	324544249	99.92
D151254	241353854	36203078100	241046494	99.87
D152211	307935046	46190256900	307771639	99.95
D152225	254699676	38204951400	254495225	99.92
D160964	220057700	33008655000	219910996	99.93
D164022	294586100	44187915000	294342018	99.92
D164102	219768106	32965215900	219499430	99.88
D1704035	254315136	38147270400	253839488	99.81
D172565	184760540	27714081000	184364409	99.79
D173151	223300720	33495108000	222712785	99.74
D181372	312693072	46903960800	311661485	99.67
D181386	248428084	37264212600	248262311	99.93
D182746	337773730	50666059500	337426435	99.9
D182764	234346926	35152038900	233429654	99.61
D19010	207727834	31159175100	207404224	99.84
T2010059074	240810352	36121552800	240427210	99.84
T2010059076	243856212	36578431800	243533862	99.87
T2010059078	289028126	43354218900	288744022	99.9
T2010059079	255208862	38281329300	254922163	99.89
T2010059086	277592134	41638820100	276959220	99.77
T2010059087	329537590	49430638500	329188602	99.89
Average				99.83
