# Supplementary material for: Whole-Genome Resequencing of Ujimqin Sheep Identifies Genes Associated with Vertebral Number
Source: Animals (Basel). 2024 Feb 21;14(5):677. doi: 10.3390/ani14050677 (PMC10931107; doi:10.3390/ani14050677)
Supplement: Supplementary file 1 [file animals-14-00677-s001.zip › Table S5.xls]

## Sheet: Sheet1
Table S5. Top 20 SNPs with the highest significance in the GWAS
SNP	Chrom	Position	P-value	Gene	Type
80566373	6	80566373	1.49e-07	-	intergenic_variant
80566288	6	80566288	2.26e-07	-	intergenic_variant
89387652	7	89387652	2.64e-07	ABCD4	intron_variant
7471466	26	7471466	2.68e-07	-	intergenic_variant
7464812	26	7464812	2.92e-07	ASB5	intron_variant
7466216	26	7466216	2.92e-07	ASB5	intron_variant
7466219	26	7466219	2.92e-07	ASB5	intron_variant
7491392	26	7491392	3.65e-07	-	intergenic_variant
89385635	7	89385635	3.77e-07	ABCD4	intron_variant
89387208	7	89387208	3.77e-07	ABCD4	intron_variant
89387444	7	89387444	3.77e-07	ABCD4	intron_variant
89389120	7	89389120	3.77e-07	ABCD4	intron_variant
89389386	7	89389386	3.77e-07	ABCD4	intron_variant
89391124	7	89391124	3.77e-07	ABCD4	intron_variant
89391618	7	89391618	3.77e-07	ABCD4	intron_variant
89391700	7	89391700	3.77e-07	ABCD4	synonymous_variant
89394075	7	89394075	3.77e-07	ABCD4	intron_variant
89397339	7	89397339	3.77e-07	ABCD4	upstream_gene_variant
89398885	7	89398885	3.77e-07	ABCD4	upstream_gene_variant
89399931	7	89399931	3.77e-07	-	intergenic_variant
