# Supplementary material for: Whole-Genome Resequencing of Ujimqin Sheep Identifies Genes Associated with Vertebral Number
Source: Animals (Basel). 2024 Feb 21;14(5):677. doi: 10.3390/ani14050677 (PMC10931107; doi:10.3390/ani14050677)
Supplement: Supplementary file 1 [file animals-14-00677-s001.zip › Table S6.xls]

## Sheet: Sheet1
Table S6. Top 100 genes with expression patterns similar to that of ABCD4
Genename
AC005519.4
ACIN1
RBM6
RBM5
TAF1C
DMTF1
SAFB2
DPH7
WASH2P
OSGEP
NEURL4
LUC7L
GIGYF1
PLCG1
ZNF767P
PSMA3-AS1
SPG7
PAXBP1
ZNF76
PHC1
PNISR
INPP5E
CTC-524C5.2
METTL3
TUBGCP6
DDX17
WDR59
ZNF337
ANAPC4
FAM160B2
CEP95
WDR19
MAN2C1
ZNF354B
RXRB
HDAC6
AC009120.6
AFG3L1P
ZNF638
ZNF160
ZNF471
NR2C1
SAFB
CPSF3L
METTL17
ZNF514
RRN3P1
SNRNP70
ATG4B
NPHP3
ZNF596
AC093838.4
AGAP6
HINFP
ZNF783
CCNL2
WDR6
EZH1
NISCH
AL136419.6
KAT2A
AKAP8L
MSANTD2
AP001062.7
EP400
DHX38
LMBR1L
SUZ12P1
ZNF83
ZNF211
CCDC130
SH2B1
LUC7L3
ING5
CROCCP3
PAN2
ZNF266
CDK10
XXbac-BPGBPG55C20.2
RP11-264B17.3
NEK9
RP11-552F3.10
RIMKLB
STK36
ZCCHC8
POU6F1
AHSA2
SIN3B
ERCC3
NBPF11
ANKS3
PPWD1
RP11-87H9.4
RP11-332H14.2
RP11-278C7.1
PRPF39
RP3-402G11.28
SDR39U1
MUTYH
TAOK2
