# Supplementary material for: Whole-Genome Resequencing of Ujimqin Sheep Identifies Genes Associated with Vertebral Number
Source: Animals (Basel). 2024 Feb 21;14(5):677. doi: 10.3390/ani14050677 (PMC10931107; doi:10.3390/ani14050677)
Supplement: Supplementary file 1 [file animals-14-00677-s001.zip › Table S7.xlsx]

## Sheet: Sheet1
Table S7. The entire GO enrichment of the top 100 genes with expression patterns similar to that of ABCD4
	ONTOLOGY	ID	Description	BgRatio	pvalue	p.adjust	qvalue	geneID	Count
GO:0006396	BP	GO:0006396	RNA processing	258/4731	0.000125038	0.0415126	0.0355371	RBM5/LOC101115213/METTL3/LUC7L3/PAN2/PRPF39	6
GO:0006397	BP	GO:0006397	mRNA processing	126/4731	0.00068096	0.104555	0.0895047	RBM5/METTL3/LUC7L3/PAN2	4
GO:0000245	BP	GO:0000245	spliceosomal complex assembly	14/4731	0.00095312	0.104555	0.0895047	RBM5/LUC7L3	2
GO:0032259	BP	GO:0032259	methylation	83/4731	0.00247275	0.104555	0.0895047	METTL3/METTL17/EZH1	3
GO:0000375	BP	GO:0000375	RNA splicing, via transesterification reactions	85/4731	0.00264717	0.104555	0.0895047	RBM5/METTL3/LUC7L3	3
GO:0000377	BP	GO:0000377	RNA splicing, via transesterification reactions with bulged adenosine as nucleophile	85/4731	0.00264717	0.104555	0.0895047	RBM5/METTL3/LUC7L3	3
GO:0000398	BP	GO:0000398	mRNA splicing, via spliceosome	85/4731	0.00264717	0.104555	0.0895047	RBM5/METTL3/LUC7L3	3
GO:0016071	BP	GO:0016071	mRNA metabolic process	182/4731	0.00268103	0.104555	0.0895047	RBM5/METTL3/LUC7L3/PAN2	4
GO:0007224	BP	GO:0007224	smoothened signaling pathway	24/4731	0.00283432	0.104555	0.0895047	WDR19/STK36	2
GO:0008380	BP	GO:0008380	RNA splicing	104/4731	0.00469249	0.14942	0.127912	RBM5/METTL3/LUC7L3	3
GO:0022613	BP	GO:0022613	ribonucleoprotein complex biogenesis	106/4731	0.00495066	0.14942	0.127912	RBM5/METTL17/LUC7L3	3
GO:0099111	BP	GO:0099111	microtubule-based transport	35/4731	0.00597918	0.165424	0.141612	WDR19/STK36	2
GO:0043414	BP	GO:0043414	macromolecule methylation	38/4731	0.00702287	0.179353	0.153536	METTL3/EZH1	2
GO:0022618	BP	GO:0022618	ribonucleoprotein complex assembly	46/4731	0.010178	0.220146	0.188457	RBM5/LUC7L3	2
GO:0071826	BP	GO:0071826	ribonucleoprotein complex subunit organization	46/4731	0.010178	0.220146	0.188457	RBM5/LUC7L3	2
GO:0009451	BP	GO:0009451	RNA modification	47/4731	0.0106094	0.220146	0.188457	LOC101115213/METTL3	2
GO:1903311	BP	GO:1903311	regulation of mRNA metabolic process	54/4731	0.0138525	0.264507	0.226432	RBM5/PAN2	2
GO:0070925	BP	GO:0070925	organelle assembly	182/4731	0.0216675	0.264507	0.226432	WDR19/PAN2/STK36	3
GO:0060271	BP	GO:0060271	cilium assembly	76/4731	0.0264223	0.264507	0.226432	WDR19/STK36	2
GO:0006417	BP	GO:0006417	regulation of translation	84/4731	0.0318156	0.264507	0.226432	METTL3/PAN2	2
GO:0044782	BP	GO:0044782	cilium organization	86/4731	0.0332276	0.264507	0.226432	WDR19/STK36	2
GO:0000381	BP	GO:0000381	regulation of alternative mRNA splicing, via spliceosome	10/4731	0.0333407	0.264507	0.226432	RBM5	1
GO:0010939	BP	GO:0010939	regulation of necrotic cell death	10/4731	0.0333407	0.264507	0.226432	MUTYH	1
GO:0021532	BP	GO:0021532	neural tube patterning	10/4731	0.0333407	0.264507	0.226432	WDR19	1
GO:0031076	BP	GO:0031076	embryonic camera-type eye development	10/4731	0.0333407	0.264507	0.226432	WDR19	1
GO:0034340	BP	GO:0034340	response to type I interferon	10/4731	0.0333407	0.264507	0.226432	METTL3	1
GO:0071357	BP	GO:0071357	cellular response to type I interferon	10/4731	0.0333407	0.264507	0.226432	METTL3	1
GO:0000380	BP	GO:0000380	alternative mRNA splicing, via spliceosome	11/4731	0.0366168	0.264507	0.226432	RBM5	1
GO:0006284	BP	GO:0006284	base-excision repair	11/4731	0.0366168	0.264507	0.226432	MUTYH	1
GO:0031050	BP	GO:0031050	dsRNA processing	11/4731	0.0366168	0.264507	0.226432	METTL3	1
GO:0035196	BP	GO:0035196	production of miRNAs involved in gene silencing by miRNA	11/4731	0.0366168	0.264507	0.226432	METTL3	1
GO:0045824	BP	GO:0045824	negative regulation of innate immune response	11/4731	0.0366168	0.264507	0.226432	METTL3	1
GO:0070918	BP	GO:0070918	production of small RNA involved in gene silencing by RNA	11/4731	0.0366168	0.264507	0.226432	METTL3	1
GO:0007018	BP	GO:0007018	microtubule-based movement	92/4731	0.0376103	0.264507	0.226432	WDR19/STK36	2
GO:0034248	BP	GO:0034248	regulation of cellular amide metabolic process	94/4731	0.039119	0.264507	0.226432	METTL3/PAN2	2
GO:0001510	BP	GO:0001510	RNA methylation	12/4731	0.0398825	0.264507	0.226432	METTL3	1
GO:0008589	BP	GO:0008589	regulation of smoothened signaling pathway	12/4731	0.0398825	0.264507	0.226432	STK36	1
GO:0018022	BP	GO:0018022	peptidyl-lysine methylation	12/4731	0.0398825	0.264507	0.226432	EZH1	1
GO:0048701	BP	GO:0048701	embryonic cranial skeleton morphogenesis	12/4731	0.0398825	0.264507	0.226432	WDR19	1
GO:0006412	BP	GO:0006412	translation	234/4731	0.0415008	0.264507	0.226432	METTL3/METTL17/PAN2	3
GO:0000288	BP	GO:0000288	nuclear-transcribed mRNA catabolic process, deadenylation-dependent decay	13/4731	0.0431378	0.264507	0.226432	PAN2	1
GO:0002183	BP	GO:0002183	cytoplasmic translational initiation	13/4731	0.0431378	0.264507	0.226432	METTL3	1
GO:0007091	BP	GO:0007091	metaphase/anaphase transition of mitotic cell cycle	13/4731	0.0431378	0.264507	0.226432	ANAPC4	1
GO:0010965	BP	GO:0010965	regulation of mitotic sister chromatid separation	13/4731	0.0431378	0.264507	0.226432	ANAPC4	1
GO:0030071	BP	GO:0030071	regulation of mitotic metaphase/anaphase transition	13/4731	0.0431378	0.264507	0.226432	ANAPC4	1
GO:0042274	BP	GO:0042274	ribosomal small subunit biogenesis	13/4731	0.0431378	0.264507	0.226432	METTL17	1
GO:0051306	BP	GO:0051306	mitotic sister chromatid separation	13/4731	0.0431378	0.264507	0.226432	ANAPC4	1
GO:0070265	BP	GO:0070265	necrotic cell death	13/4731	0.0431378	0.264507	0.226432	MUTYH	1
GO:1902117	BP	GO:1902117	positive regulation of organelle assembly	13/4731	0.0431378	0.264507	0.226432	PAN2	1
GO:0030031	BP	GO:0030031	cell projection assembly	100/4731	0.0437837	0.264507	0.226432	WDR19/STK36	2
GO:0120031	BP	GO:0120031	plasma membrane bounded cell projection assembly	100/4731	0.0437837	0.264507	0.226432	WDR19/STK36	2
GO:0043043	BP	GO:0043043	peptide biosynthetic process	240/4731	0.0442368	0.264507	0.226432	METTL3/METTL17/PAN2	3
GO:0006446	BP	GO:0006446	regulation of translational initiation	14/4731	0.0463828	0.264507	0.226432	METTL3	1
GO:0016571	BP	GO:0016571	histone methylation	14/4731	0.0463828	0.264507	0.226432	EZH1	1
GO:0032008	BP	GO:0032008	positive regulation of TOR signaling	14/4731	0.0463828	0.264507	0.226432	WDR59	1
GO:0044784	BP	GO:0044784	metaphase/anaphase transition of cell cycle	14/4731	0.0463828	0.264507	0.226432	ANAPC4	1
GO:1902099	BP	GO:1902099	regulation of metaphase/anaphase transition of cell cycle	14/4731	0.0463828	0.264507	0.226432	ANAPC4	1
GO:1905818	BP	GO:1905818	regulation of chromosome separation	14/4731	0.0463828	0.264507	0.226432	ANAPC4	1
GO:0034470	BP	GO:0034470	ncRNA processing	104/4731	0.0470057	0.264507	0.226432	LOC101115213/METTL3	2
GO:0033045	BP	GO:0033045	regulation of sister chromatid segregation	15/4731	0.0496174	0.265693	0.227448	ANAPC4	1
GO:0061512	BP	GO:0061512	protein localization to cilium	15/4731	0.0496174	0.265693	0.227448	WDR19	1
GO:1904888	BP	GO:1904888	cranial skeletal system development	15/4731	0.0496174	0.265693	0.227448	WDR19	1
GO:0042073	BP	GO:0042073	intraciliary transport	16/4731	0.0528418	0.26581	0.227548	WDR19	1
GO:0051983	BP	GO:0051983	regulation of chromosome segregation	16/4731	0.0528418	0.26581	0.227548	ANAPC4	1
GO:0061014	BP	GO:0061014	positive regulation of mRNA catabolic process	16/4731	0.0528418	0.26581	0.227548	PAN2	1
GO:0061157	BP	GO:0061157	mRNA destabilization	16/4731	0.0528418	0.26581	0.227548	PAN2	1
GO:0010608	BP	GO:0010608	posttranscriptional regulation of gene expression	112/4731	0.0537069	0.265865	0.227595	METTL3/PAN2	2
GO:0040029	BP	GO:0040029	regulation of gene expression, epigenetic	17/4731	0.0560559	0.265865	0.227595	METTL3	1
GO:0050779	BP	GO:0050779	RNA destabilization	17/4731	0.0560559	0.265865	0.227595	PAN2	1
GO:0051304	BP	GO:0051304	chromosome separation	17/4731	0.0560559	0.265865	0.227595	ANAPC4	1
GO:0009953	BP	GO:0009953	dorsal/ventral pattern formation	18/4731	0.0592598	0.2758	0.2361	WDR19	1
GO:0043604	BP	GO:0043604	amide biosynthetic process	271/4731	0.0598121	0.2758	0.2361	METTL3/METTL17/PAN2	3
GO:0009791	BP	GO:0009791	post-embryonic development	19/4731	0.0624535	0.276443	0.236651	STK36	1
GO:0048024	BP	GO:0048024	regulation of mRNA splicing, via spliceosome	19/4731	0.0624535	0.276443	0.236651	RBM5	1
GO:0006518	BP	GO:0006518	peptide metabolic process	281/4731	0.0653394	0.276443	0.236651	METTL3/METTL17/PAN2	3
GO:0002832	BP	GO:0002832	negative regulation of response to biotic stimulus	20/4731	0.065637	0.276443	0.236651	METTL3	1
GO:0006479	BP	GO:0006479	protein methylation	20/4731	0.065637	0.276443	0.236651	EZH1	1
GO:0008213	BP	GO:0008213	protein alkylation	20/4731	0.065637	0.276443	0.236651	EZH1	1
GO:0002181	BP	GO:0002181	cytoplasmic translation	21/4731	0.0688104	0.276443	0.236651	METTL3	1
GO:0009267	BP	GO:0009267	cellular response to starvation	21/4731	0.0688104	0.276443	0.236651	WDR59	1
GO:0034660	BP	GO:0034660	ncRNA metabolic process	130/4731	0.0699466	0.276443	0.236651	LOC101115213/METTL3	2
GO:0006400	BP	GO:0006400	tRNA modification	22/4731	0.0719737	0.276443	0.236651	LOC101115213	1
GO:0035195	BP	GO:0035195	gene silencing by miRNA	22/4731	0.0719737	0.276443	0.236651	METTL3	1
GO:0043484	BP	GO:0043484	regulation of RNA splicing	22/4731	0.0719737	0.276443	0.236651	RBM5	1
GO:0055123	BP	GO:0055123	digestive system development	22/4731	0.0719737	0.276443	0.236651	WDR19	1
GO:0034644	BP	GO:0034644	cellular response to UV	23/4731	0.0751269	0.276443	0.236651	METTL3	1
GO:0035194	BP	GO:0035194	post-transcriptional gene silencing by RNA	23/4731	0.0751269	0.276443	0.236651	METTL3	1
GO:0042594	BP	GO:0042594	response to starvation	23/4731	0.0751269	0.276443	0.236651	WDR59	1
GO:0006413	BP	GO:0006413	translational initiation	24/4731	0.07827	0.276443	0.236651	METTL3	1
GO:0016441	BP	GO:0016441	posttranscriptional gene silencing	24/4731	0.07827	0.276443	0.236651	METTL3	1
GO:0045727	BP	GO:0045727	positive regulation of translation	24/4731	0.07827	0.276443	0.236651	METTL3	1
GO:0048704	BP	GO:0048704	embryonic skeletal system morphogenesis	24/4731	0.07827	0.276443	0.236651	WDR19	1
GO:0061053	BP	GO:0061053	somite development	24/4731	0.07827	0.276443	0.236651	WDR19	1
GO:1903313	BP	GO:1903313	positive regulation of mRNA metabolic process	24/4731	0.07827	0.276443	0.236651	PAN2	1
GO:0001959	BP	GO:0001959	regulation of cytokine-mediated signaling pathway	25/4731	0.0814032	0.284483	0.243533	METTL3	1
GO:0071482	BP	GO:0071482	cellular response to light stimulus	26/4731	0.0845263	0.288082	0.246615	METTL3	1
GO:0031669	BP	GO:0031669	cellular response to nutrient levels	27/4731	0.0876395	0.288082	0.246615	WDR59	1
GO:0042471	BP	GO:0042471	ear morphogenesis	27/4731	0.0876395	0.288082	0.246615	WDR19	1
GO:0043488	BP	GO:0043488	regulation of mRNA stability	27/4731	0.0876395	0.288082	0.246615	PAN2	1
GO:0050684	BP	GO:0050684	regulation of mRNA processing	27/4731	0.0876395	0.288082	0.246615	RBM5	1
GO:0060759	BP	GO:0060759	regulation of response to cytokine stimulus	27/4731	0.0876395	0.288082	0.246615	METTL3	1
GO:0034250	BP	GO:0034250	positive regulation of cellular amide metabolic process	28/4731	0.0907428	0.290725	0.248877	METTL3	1
GO:0061013	BP	GO:0061013	regulation of mRNA catabolic process	28/4731	0.0907428	0.290725	0.248877	PAN2	1
GO:0010970	BP	GO:0010970	transport along microtubule	29/4731	0.0938361	0.290725	0.248877	WDR19	1
GO:0032006	BP	GO:0032006	regulation of TOR signaling	29/4731	0.0938361	0.290725	0.248877	WDR59	1
GO:0030326	BP	GO:0030326	embryonic limb morphogenesis	30/4731	0.0969196	0.290725	0.248877	WDR19	1
GO:0030705	BP	GO:0030705	cytoskeleton-dependent intracellular transport	30/4731	0.0969196	0.290725	0.248877	WDR19	1
GO:0035113	BP	GO:0035113	embryonic appendage morphogenesis	30/4731	0.0969196	0.290725	0.248877	WDR19	1
GO:0043487	BP	GO:0043487	regulation of RNA stability	30/4731	0.0969196	0.290725	0.248877	PAN2	1
GO:0000209	BP	GO:0000209	protein polyubiquitination	31/4731	0.0999933	0.290725	0.248877	ANAPC4	1
GO:0017148	BP	GO:0017148	negative regulation of translation	31/4731	0.0999933	0.290725	0.248877	PAN2	1
GO:0048706	BP	GO:0048706	embryonic skeletal system development	31/4731	0.0999933	0.290725	0.248877	WDR19	1
GO:0000070	BP	GO:0000070	mitotic sister chromatid segregation	32/4731	0.103057	0.290725	0.248877	ANAPC4	1
GO:0031929	BP	GO:0031929	TOR signaling	32/4731	0.103057	0.290725	0.248877	WDR59	1
GO:0035107	BP	GO:0035107	appendage morphogenesis	32/4731	0.103057	0.290725	0.248877	WDR19	1
GO:0035108	BP	GO:0035108	limb morphogenesis	32/4731	0.103057	0.290725	0.248877	WDR19	1
GO:0065003	BP	GO:0065003	protein-containing complex assembly	341/4731	0.103319	0.290725	0.248877	RBM5/WDR19/LUC7L3	3
GO:0031668	BP	GO:0031668	cellular response to extracellular stimulus	33/4731	0.106111	0.290725	0.248877	WDR59	1
GO:0033044	BP	GO:0033044	regulation of chromosome organization	33/4731	0.106111	0.290725	0.248877	ANAPC4	1
GO:0045088	BP	GO:0045088	regulation of innate immune response	33/4731	0.106111	0.290725	0.248877	METTL3	1
GO:0050777	BP	GO:0050777	negative regulation of immune response	33/4731	0.106111	0.290725	0.248877	METTL3	1
GO:0043603	BP	GO:0043603	cellular amide metabolic process	346/4731	0.106833	0.290725	0.248877	METTL3/METTL17/PAN2	3
GO:0031047	BP	GO:0031047	gene silencing by RNA	34/4731	0.109156	0.292255	0.250187	METTL3	1
GO:0034249	BP	GO:0034249	negative regulation of cellular amide metabolic process	34/4731	0.109156	0.292255	0.250187	PAN2	1
GO:0000956	BP	GO:0000956	nuclear-transcribed mRNA catabolic process	36/4731	0.115215	0.305518	0.261541	PAN2	1
GO:0009411	BP	GO:0009411	response to UV	37/4731	0.11823	0.305518	0.261541	METTL3	1
GO:0003341	BP	GO:0003341	cilium movement	38/4731	0.121236	0.305518	0.261541	STK36	1
GO:0021915	BP	GO:0021915	neural tube development	38/4731	0.121236	0.305518	0.261541	WDR19	1
GO:0071478	BP	GO:0071478	cellular response to radiation	38/4731	0.121236	0.305518	0.261541	METTL3	1
GO:0033554	BP	GO:0033554	cellular response to stress	369/4731	0.123629	0.305518	0.261541	METTL3/WDR59/MUTYH	3
GO:0000819	BP	GO:0000819	sister chromatid segregation	39/4731	0.124232	0.305518	0.261541	ANAPC4	1
GO:0008406	BP	GO:0008406	gonad development	39/4731	0.124232	0.305518	0.261541	WDR19	1
GO:0045137	BP	GO:0045137	development of primary sexual characteristics	39/4731	0.124232	0.305518	0.261541	WDR19	1
GO:0048736	BP	GO:0048736	appendage development	39/4731	0.124232	0.305518	0.261541	WDR19	1
GO:0060173	BP	GO:0060173	limb development	39/4731	0.124232	0.305518	0.261541	WDR19	1
GO:0008033	BP	GO:0008033	tRNA processing	40/4731	0.127218	0.306061	0.262006	LOC101115213	1
GO:0016458	BP	GO:0016458	gene silencing	40/4731	0.127218	0.306061	0.262006	METTL3	1
GO:1902115	BP	GO:1902115	regulation of organelle assembly	40/4731	0.127218	0.306061	0.262006	PAN2	1
GO:0031348	BP	GO:0031348	negative regulation of defense response	41/4731	0.130195	0.310684	0.265962	METTL3	1
GO:0010629	BP	GO:0010629	negative regulation of gene expression	188/4731	0.131011	0.310684	0.265962	METTL3/PAN2	2
GO:0007548	BP	GO:0007548	sex differentiation	42/4731	0.133163	0.313546	0.268413	WDR19	1
GO:0043933	BP	GO:0043933	protein-containing complex subunit organization	383/4731	0.134336	0.314082	0.268872	RBM5/WDR19/LUC7L3	3
GO:0006974	BP	GO:0006974	cellular response to DNA damage stimulus	194/4731	0.13792	0.31842	0.272585	METTL3/MUTYH	2
GO:0031503	BP	GO:0031503	protein-containing complex localization	44/4731	0.139069	0.31842	0.272585	WDR19	1
GO:0071496	BP	GO:0071496	cellular response to external stimulus	44/4731	0.139069	0.31842	0.272585	WDR59	1
GO:0043583	BP	GO:0043583	ear development	46/4731	0.144937	0.329583	0.282142	WDR19	1
GO:0007017	BP	GO:0007017	microtubule-based process	201/4731	0.14609	0.329945	0.282451	WDR19/STK36	2
GO:0031667	BP	GO:0031667	response to nutrient levels	47/4731	0.147857	0.33168	0.283937	WDR59	1
GO:0098813	BP	GO:0098813	nuclear chromosome segregation	51/4731	0.159445	0.355273	0.304134	ANAPC4	1
GO:0051091	BP	GO:0051091	positive regulation of DNA-binding transcription factor activity	52/4731	0.162319	0.359265	0.307551	STK36	1
GO:0009991	BP	GO:0009991	response to extracellular stimulus	53/4731	0.165183	0.363184	0.310906	WDR59	1
GO:0033043	BP	GO:0033043	regulation of organelle organization	218/4731	0.166367	0.363381	0.311075	ANAPC4/PAN2	2
GO:0048705	BP	GO:0048705	skeletal system morphogenesis	55/4731	0.170885	0.367742	0.314808	WDR19	1
GO:0006402	BP	GO:0006402	mRNA catabolic process	56/4731	0.173722	0.367742	0.314808	PAN2	1
GO:0048562	BP	GO:0048562	embryonic organ morphogenesis	56/4731	0.173722	0.367742	0.314808	WDR19	1
GO:0090596	BP	GO:0090596	sensory organ morphogenesis	57/4731	0.176549	0.367742	0.314808	WDR19	1
GO:0140014	BP	GO:0140014	mitotic nuclear division	57/4731	0.176549	0.367742	0.314808	ANAPC4	1
GO:0120036	BP	GO:0120036	plasma membrane bounded cell projection organization	229/4731	0.179773	0.367742	0.314808	WDR19/STK36	2
GO:0006399	BP	GO:0006399	tRNA metabolic process	59/4731	0.182178	0.367742	0.314808	LOC101115213	1
GO:0018205	BP	GO:0018205	peptidyl-lysine modification	59/4731	0.182178	0.367742	0.314808	EZH1	1
GO:0043161	BP	GO:0043161	proteasome-mediated ubiquitin-dependent protein catabolic process	59/4731	0.182178	0.367742	0.314808	ANAPC4	1
GO:1901990	BP	GO:1901990	regulation of mitotic cell cycle phase transition	59/4731	0.182178	0.367742	0.314808	ANAPC4	1
GO:0034622	BP	GO:0034622	cellular protein-containing complex assembly	231/4731	0.182232	0.367742	0.314808	RBM5/LUC7L3	2
GO:0044265	BP	GO:0044265	cellular macromolecule catabolic process	233/4731	0.184696	0.367742	0.314808	ANAPC4/PAN2	2
GO:0007059	BP	GO:0007059	chromosome segregation	60/4731	0.184979	0.367742	0.314808	ANAPC4	1
GO:0071214	BP	GO:0071214	cellular response to abiotic stimulus	60/4731	0.184979	0.367742	0.314808	METTL3	1
GO:0104004	BP	GO:0104004	cellular response to environmental stimulus	60/4731	0.184979	0.367742	0.314808	METTL3	1
GO:0043010	BP	GO:0043010	camera-type eye development	62/4731	0.190553	0.37657	0.322365	WDR19	1
GO:1990778	BP	GO:1990778	protein localization to cell periphery	63/4731	0.193327	0.379791	0.325122	WDR19	1
GO:0030030	BP	GO:0030030	cell projection organization	244/4731	0.198351	0.383823	0.328574	WDR19/STK36	2
GO:0002831	BP	GO:0002831	regulation of response to biotic stimulus	65/4731	0.198848	0.383823	0.328574	METTL3	1
GO:0042254	BP	GO:0042254	ribosome biogenesis	65/4731	0.198848	0.383823	0.328574	METTL17	1
GO:0031331	BP	GO:0031331	positive regulation of cellular catabolic process	66/4731	0.201595	0.386877	0.331188	PAN2	1
GO:0006401	BP	GO:0006401	RNA catabolic process	67/4731	0.204334	0.389878	0.333758	PAN2	1
GO:0032102	BP	GO:0032102	negative regulation of response to external stimulus	68/4731	0.207063	0.392829	0.336283	METTL3	1
GO:0009416	BP	GO:0009416	response to light stimulus	70/4731	0.212496	0.397477	0.340263	METTL3	1
GO:0019221	BP	GO:0019221	cytokine-mediated signaling pathway	70/4731	0.212496	0.397477	0.340263	METTL3	1
GO:0007166	BP	GO:0007166	cell surface receptor signaling pathway	476/4731	0.21315	0.397477	0.340263	METTL3/WDR19/STK36	3
GO:0010498	BP	GO:0010498	proteasomal protein catabolic process	71/4731	0.215199	0.397477	0.340263	ANAPC4	1
GO:0009967	BP	GO:0009967	positive regulation of signal transduction	258/4731	0.21594	0.397477	0.340263	WDR59/STK36	2
GO:0001654	BP	GO:0001654	eye development	72/4731	0.217894	0.397477	0.340263	WDR19	1
GO:0003002	BP	GO:0003002	regionalization	72/4731	0.217894	0.397477	0.340263	WDR19	1
GO:0048880	BP	GO:0048880	sensory system development	73/4731	0.22058	0.398003	0.340713	WDR19	1
GO:0150063	BP	GO:0150063	visual system development	73/4731	0.22058	0.398003	0.340713	WDR19	1
GO:1901566	BP	GO:1901566	organonitrogen compound biosynthetic process	491/4731	0.226866	0.407132	0.348528	METTL3/METTL17/PAN2	3
GO:0016570	BP	GO:0016570	histone modification	76/4731	0.228586	0.408014	0.349282	EZH1	1
GO:0051090	BP	GO:0051090	regulation of DNA-binding transcription factor activity	77/4731	0.231237	0.408675	0.349849	STK36	1
GO:0002683	BP	GO:0002683	negative regulation of immune system process	78/4731	0.23388	0.408675	0.349849	METTL3	1
GO:0009896	BP	GO:0009896	positive regulation of catabolic process	78/4731	0.23388	0.408675	0.349849	PAN2	1
GO:0044772	BP	GO:0044772	mitotic cell cycle phase transition	78/4731	0.23388	0.408675	0.349849	ANAPC4	1
GO:0140694	BP	GO:0140694	non-membrane-bounded organelle assembly	79/4731	0.236515	0.408973	0.350104	PAN2	1
GO:1901987	BP	GO:1901987	regulation of cell cycle phase transition	79/4731	0.236515	0.408973	0.350104	ANAPC4	1
GO:0009057	BP	GO:0009057	macromolecule catabolic process	277/4731	0.240099	0.41302	0.353568	ANAPC4/PAN2	2
GO:0010647	BP	GO:0010647	positive regulation of cell communication	284/4731	0.249061	0.420662	0.36011	WDR59/STK36	2
GO:0007389	BP	GO:0007389	pattern specification process	84/4731	0.24956	0.420662	0.36011	WDR19	1
GO:0023056	BP	GO:0023056	positive regulation of signaling	285/4731	0.250343	0.420662	0.36011	WDR59/STK36	2
GO:0001701	BP	GO:0001701	in utero embryonic development	85/4731	0.252144	0.420662	0.36011	WDR19	1
GO:0048608	BP	GO:0048608	reproductive structure development	85/4731	0.252144	0.420662	0.36011	WDR19	1
GO:0061458	BP	GO:0061458	reproductive system development	85/4731	0.252144	0.420662	0.36011	WDR19	1
GO:0000280	BP	GO:0000280	nuclear division	90/4731	0.264938	0.433298	0.370927	ANAPC4	1
GO:0007346	BP	GO:0007346	regulation of mitotic cell cycle	90/4731	0.264938	0.433298	0.370927	ANAPC4	1
GO:0044089	BP	GO:0044089	positive regulation of cellular component biogenesis	90/4731	0.264938	0.433298	0.370927	PAN2	1
GO:0048568	BP	GO:0048568	embryonic organ development	90/4731	0.264938	0.433298	0.370927	WDR19	1
GO:0034655	BP	GO:0034655	nucleobase-containing compound catabolic process	93/4731	0.272516	0.443507	0.379666	PAN2	1
GO:0043067	BP	GO:0043067	regulation of programmed cell death	304/4731	0.274776	0.445003	0.380947	RBM5/MUTYH	2
GO:0009314	BP	GO:0009314	response to radiation	96/4731	0.280021	0.450923	0.386015	METTL3	1
GO:0044770	BP	GO:0044770	cell cycle phase transition	97/4731	0.282506	0.450923	0.386015	ANAPC4	1
GO:0048285	BP	GO:0048285	organelle fission	97/4731	0.282506	0.450923	0.386015	ANAPC4	1
GO:0010638	BP	GO:0010638	positive regulation of organelle organization	100/4731	0.289914	0.460533	0.394242	PAN2	1
GO:0044270	BP	GO:0044270	cellular nitrogen compound catabolic process	103/4731	0.29725	0.465505	0.398498	PAN2	1
GO:0046700	BP	GO:0046700	heterocycle catabolic process	103/4731	0.29725	0.465505	0.398498	PAN2	1
GO:0072657	BP	GO:0072657	protein localization to membrane	103/4731	0.29725	0.465505	0.398498	WDR19	1
GO:0010941	BP	GO:0010941	regulation of cell death	327/4731	0.304424	0.472426	0.404423	RBM5/MUTYH	2
GO:0007420	BP	GO:0007420	brain development	106/4731	0.304515	0.472426	0.404423	STK36	1
GO:0043065	BP	GO:0043065	positive regulation of apoptotic process	107/4731	0.306921	0.473944	0.405722	RBM5	1
GO:0019439	BP	GO:0019439	aromatic compound catabolic process	108/4731	0.309319	0.475435	0.406999	PAN2	1
GO:0043068	BP	GO:0043068	positive regulation of programmed cell death	109/4731	0.31171	0.476902	0.408255	RBM5	1
GO:1901361	BP	GO:1901361	organic cyclic compound catabolic process	110/4731	0.314093	0.478343	0.409488	PAN2	1
GO:0007423	BP	GO:0007423	sensory organ development	111/4731	0.316467	0.479759	0.4107	WDR19	1
GO:0006511	BP	GO:0006511	ubiquitin-dependent protein catabolic process	112/4731	0.318835	0.480869	0.411651	ANAPC4	1
GO:0001501	BP	GO:0001501	skeletal system development	113/4731	0.321194	0.480869	0.411651	WDR19	1
GO:0019941	BP	GO:0019941	modification-dependent protein catabolic process	114/4731	0.323546	0.480869	0.411651	ANAPC4	1
GO:0031347	BP	GO:0031347	regulation of defense response	115/4731	0.32589	0.480869	0.411651	METTL3	1
GO:0043632	BP	GO:0043632	modification-dependent macromolecule catabolic process	115/4731	0.32589	0.480869	0.411651	ANAPC4	1
GO:0060322	BP	GO:0060322	head development	115/4731	0.32589	0.480869	0.411651	STK36	1
GO:0051301	BP	GO:0051301	cell division	116/4731	0.328227	0.482174	0.412768	ANAPC4	1
GO:0045087	BP	GO:0045087	innate immune response	118/4731	0.332877	0.484716	0.414944	METTL3	1
GO:0051668	BP	GO:0051668	localization within membrane	118/4731	0.332877	0.484716	0.414944	WDR19	1
GO:0010942	BP	GO:0010942	positive regulation of cell death	119/4731	0.335191	0.485954	0.416004	RBM5	1
GO:0007399	BP	GO:0007399	nervous system development	353/4731	0.337834	0.487656	0.417461	WDR19/STK36	2
GO:0031329	BP	GO:0031329	regulation of cellular catabolic process	124/4731	0.346648	0.498213	0.426498	PAN2	1
GO:0048598	BP	GO:0048598	embryonic morphogenesis	125/4731	0.348917	0.499313	0.42744	WDR19	1
GO:0006928	BP	GO:0006928	movement of cell or subcellular component	363/4731	0.350611	0.499583	0.427671	WDR19/STK36	2
GO:0016604	CC	GO:0016604	nuclear body	172/5793	0.000100813	0.00249964	0.00210496	LOC101115213/PNISR/METTL3/LUC7L3/PPWD1	5
GO:0016607	CC	GO:0016607	nuclear speck	90/5793	0.000111095	0.00249964	0.00210496	LOC101115213/PNISR/METTL3/LUC7L3	4
GO:0140513	CC	GO:0140513	nuclear protein-containing complex	335/5793	0.0143411	0.180273	0.151809	RBM5/ANAPC4/LUC7L3/PPWD1	4
GO:0005681	CC	GO:0005681	spliceosomal complex	67/5793	0.0160243	0.180273	0.151809	RBM5/PPWD1	2
GO:1990904	CC	GO:1990904	ribonucleoprotein complex	205/5793	0.0205826	0.184165	0.155087	RBM5/LUC7L3/PPWD1	3
GO:0005680	CC	GO:0005680	anaphase-promoting complex	10/5793	0.0289835	0.184165	0.155087	ANAPC4	1
GO:0030990	CC	GO:0030990	intraciliary transport particle	12/5793	0.0346845	0.184165	0.155087	WDR19	1
GO:0035869	CC	GO:0035869	ciliary transition zone	13/5793	0.0375231	0.184165	0.155087	WDR19	1
GO:0000152	CC	GO:0000152	nuclear ubiquitin ligase complex	15/5793	0.0431769	0.184165	0.155087	ANAPC4	1
GO:0000932	CC	GO:0000932	P-body	18/5793	0.051599	0.184165	0.155087	PAN2	1
GO:0097525	CC	GO:0097525	spliceosomal snRNP complex	18/5793	0.051599	0.184165	0.155087	LUC7L3	1
GO:0097733	CC	GO:0097733	photoreceptor cell cilium	18/5793	0.051599	0.184165	0.155087	WDR19	1
GO:0030532	CC	GO:0030532	small nuclear ribonucleoprotein complex	21/5793	0.0599513	0.184165	0.155087	LUC7L3	1
GO:0071013	CC	GO:0071013	catalytic step 2 spliceosome	21/5793	0.0599513	0.184165	0.155087	PPWD1	1
GO:0097731	CC	GO:0097731	9+0 non-motile cilium	22/5793	0.06272	0.184165	0.155087	WDR19	1
GO:0034708	CC	GO:0034708	methyltransferase complex	23/5793	0.065481	0.184165	0.155087	METTL3	1
GO:0097730	CC	GO:0097730	non-motile cilium	25/5793	0.0709801	0.184295	0.155196	WDR19	1
GO:0120114	CC	GO:0120114	Sm-like protein family complex	26/5793	0.0737182	0.184295	0.155196	LUC7L3	1
GO:0000922	CC	GO:0000922	spindle pole	32/5793	0.0899879	0.204396	0.172123	CEP95	1
GO:1902494	CC	GO:1902494	catalytic complex	371/5793	0.0908428	0.204396	0.172123	METTL3/ANAPC4/PPWD1	3
GO:1990234	CC	GO:1990234	transferase complex	184/5793	0.0999247	0.214124	0.180315	METTL3/ANAPC4	2
GO:0031461	CC	GO:0031461	cullin-RING ubiquitin ligase complex	38/5793	0.105988	0.216795	0.182564	ANAPC4	1
GO:0036464	CC	GO:0036464	cytoplasmic ribonucleoprotein granule	48/5793	0.132069	0.241879	0.203688	PAN2	1
GO:0005765	CC	GO:0005765	lysosomal membrane	51/5793	0.139752	0.241879	0.203688	WDR59	1
GO:0035770	CC	GO:0035770	ribonucleoprotein granule	51/5793	0.139752	0.241879	0.203688	PAN2	1
GO:0098852	CC	GO:0098852	lytic vacuole membrane	51/5793	0.139752	0.241879	0.203688	WDR59	1
GO:0000151	CC	GO:0000151	ubiquitin ligase complex	56/5793	0.152416	0.254027	0.213917	ANAPC4	1
GO:0031514	CC	GO:0031514	motile cilium	63/5793	0.169851	0.272974	0.229873	WDR19	1
GO:0005774	CC	GO:0005774	vacuolar membrane	70/5793	0.186947	0.29009	0.244287	WDR59	1
GO:0005819	CC	GO:0005819	spindle	75/5793	0.198956	0.298433	0.251312	CEP95	1
GO:0005759	CC	GO:0005759	mitochondrial matrix	78/5793	0.20608	0.299149	0.251915	METTL17	1
GO:0000323	CC	GO:0000323	lytic vacuole	117/5793	0.293438	0.400143	0.336963	WDR59	1
GO:0005764	CC	GO:0005764	lysosome	117/5793	0.293438	0.400143	0.336963	WDR59	1
GO:0005813	CC	GO:0005813	centrosome	139/5793	0.338641	0.435395	0.366648	CEP95	1
GO:0043005	CC	GO:0043005	neuron projection	139/5793	0.338641	0.435395	0.366648	WDR19	1
GO:0005773	CC	GO:0005773	vacuole	149/5793	0.358274	0.447843	0.377131	WDR59	1
GO:0005929	CC	GO:0005929	cilium	159/5793	0.377359	0.45895	0.386484	WDR19	1
GO:0005815	CC	GO:0005815	microtubule organizing center	182/5793	0.419245	0.496474	0.418083	CEP95	1
GO:0003729	MF	GO:0003729	mRNA binding	60/5462	0.00042095	0.0210475	0.0141794	RBM5/METTL3/LUC7L3	3
GO:0008168	MF	GO:0008168	methyltransferase activity	85/5462	0.00116978	0.0222809	0.0150103	METTL3/METTL17/EZH1	3
GO:0016741	MF	GO:0016741	transferase activity, transferring one-carbon groups	89/5462	0.00133686	0.0222809	0.0150103	METTL3/METTL17/EZH1	3
GO:0008757	MF	GO:0008757	S-adenosylmethionine-dependent methyltransferase activity	40/5462	0.00450158	0.0562698	0.0379081	METTL3/EZH1	2
GO:1901681	MF	GO:1901681	sulfur compound binding	53/5462	0.00780296	0.0780296	0.0525673	METTL3/METTL17	2
GO:0003723	MF	GO:0003723	RNA binding	407/5462	0.0166794	0.118165	0.079606	RBM6/RBM5/METTL3/LUC7L3	4
GO:0000175	MF	GO:0000175	3'-5'-exoribonuclease activity	11/5462	0.0278614	0.118165	0.079606	PAN2	1
GO:0042054	MF	GO:0042054	histone methyltransferase activity	12/5462	0.0303582	0.118165	0.079606	EZH1	1
GO:0004532	MF	GO:0004532	exoribonuclease activity	13/5462	0.032849	0.118165	0.079606	PAN2	1
GO:0008408	MF	GO:0008408	3'-5' exonuclease activity	13/5462	0.032849	0.118165	0.079606	PAN2	1
GO:0016896	MF	GO:0016896	exoribonuclease activity, producing 5'-phosphomonoesters	13/5462	0.032849	0.118165	0.079606	PAN2	1
GO:0051539	MF	GO:0051539	4 iron, 4 sulfur cluster binding	13/5462	0.032849	0.118165	0.079606	MUTYH	1
GO:0016278	MF	GO:0016278	lysine N-methyltransferase activity	14/5462	0.0353339	0.118165	0.079606	EZH1	1
GO:0016279	MF	GO:0016279	protein-lysine N-methyltransferase activity	14/5462	0.0353339	0.118165	0.079606	EZH1	1
GO:0008173	MF	GO:0008173	RNA methyltransferase activity	15/5462	0.0378128	0.118165	0.079606	METTL3	1
GO:0016538	MF	GO:0016538	cyclin-dependent protein serine/threonine kinase regulator activity	15/5462	0.0378128	0.118165	0.079606	CCNL2	1
GO:0140098	MF	GO:0140098	catalytic activity, acting on RNA	130/5462	0.0424336	0.124558	0.0839129	METTL3/PAN2	2
GO:0016796	MF	GO:0016796	exonuclease activity, active with either ribo- or deoxyribonucleic acids and producing 5'-phosphomonoesters	18/5462	0.0452143	0.124558	0.0839129	PAN2	1
GO:0043022	MF	GO:0043022	ribosome binding	21/5462	0.0525628	0.124558	0.0839129	METTL17	1
GO:0003755	MF	GO:0003755	peptidyl-prolyl cis-trans isomerase activity	22/5462	0.0550006	0.124558	0.0839129	PPWD1	1
GO:0008170	MF	GO:0008170	N-methyltransferase activity	23/5462	0.0574326	0.124558	0.0839129	EZH1	1
GO:0008276	MF	GO:0008276	protein methyltransferase activity	23/5462	0.0574326	0.124558	0.0839129	EZH1	1
GO:0051536	MF	GO:0051536	iron-sulfur cluster binding	24/5462	0.0598587	0.124558	0.0839129	MUTYH	1
GO:0051540	MF	GO:0051540	metal cluster binding	24/5462	0.0598587	0.124558	0.0839129	MUTYH	1
GO:0016859	MF	GO:0016859	cis-trans isomerase activity	25/5462	0.0622791	0.124558	0.0839129	PPWD1	1
GO:0004527	MF	GO:0004527	exonuclease activity	28/5462	0.0695055	0.133665	0.0900477	PAN2	1
GO:0004540	MF	GO:0004540	ribonuclease activity	30/5462	0.0742944	0.137582	0.092687	PAN2	1
GO:0043021	MF	GO:0043021	ribonucleoprotein complex binding	32/5462	0.0790604	0.141179	0.0951102	METTL17	1
GO:0140640	MF	GO:0140640	catalytic activity, acting on a nucleic acid	189/5462	0.0825206	0.142277	0.0958496	METTL3/PAN2	2
GO:0042277	MF	GO:0042277	peptide binding	37/5462	0.0908758	0.15146	0.102036	PPWD1	1
GO:0016798	MF	GO:0016798	hydrolase activity, acting on glycosyl bonds	42/5462	0.10255	0.163857	0.110388	MUTYH	1
GO:0019887	MF	GO:0019887	protein kinase regulator activity	43/5462	0.104868	0.163857	0.110388	CCNL2	1
GO:0019207	MF	GO:0019207	kinase regulator activity	46/5462	0.11179	0.169378	0.114107	CCNL2	1
GO:0033218	MF	GO:0033218	amide binding	51/5462	0.123214	0.181198	0.12207	PPWD1	1
GO:0016747	MF	GO:0016747	acyltransferase activity, transferring groups other than amino-acyl groups	67/5462	0.158863	0.226948	0.152891	LOC101115213	1
GO:0004518	MF	GO:0004518	nuclease activity	70/5462	0.165396	0.229716	0.154756	PAN2	1
GO:0016853	MF	GO:0016853	isomerase activity	73/5462	0.171881	0.232272	0.156478	PPWD1	1
GO:0008134	MF	GO:0008134	transcription factor binding	77/5462	0.180456	0.237441	0.159961	STK36	1
GO:0004674	MF	GO:0004674	protein serine/threonine kinase activity	82/5462	0.191058	0.241453	0.162663	STK36	1
GO:0016746	MF	GO:0016746	acyltransferase activity	83/5462	0.193163	0.241453	0.162663	LOC101115213	1
GO:0046982	MF	GO:0046982	protein heterodimerization activity	113/5462	0.253999	0.309755	0.208677	METTL3	1
GO:0005524	MF	GO:0005524	ATP binding	490/5462	0.36176	0.430666	0.290133	RIMKLB/STK36	2
GO:0004672	MF	GO:0004672	protein kinase activity	183/5462	0.379776	0.4416	0.297499	STK36	1
GO:0044877	MF	GO:0044877	protein-containing complex binding	194/5462	0.397648	0.451873	0.30442	METTL17	1
