# Supplementary material for: Whole-Genome Resequencing of Ujimqin Sheep Identifies Genes Associated with Vertebral Number
Source: Animals (Basel). 2024 Feb 21;14(5):677. doi: 10.3390/ani14050677 (PMC10931107; doi:10.3390/ani14050677)
Supplement: Supplementary file 1 [file animals-14-00677-s001.zip › Table S8.xlsx]

## Sheet: Sheet1
Table S8. The entire KEGG enrichment of the top 100 genes with expression patterns similar to that of ABCD4
	ID	Description	BgRatio	pvalue	p.adjust	qvalue	geneID	Count
oas04919	oas04919	Thyroid hormone signaling pathway	124/9128	0.00402069	0.21245	0.199124	101103341/101110798/101109985	3
oas05168	oas05168	Herpes simplex virus 1 infection	455/9128	0.00582055	0.21245	0.199124	101104313/101115269/101104371/105610305/101109964	5
