# Supplementary material for: Whole-Genome Resequencing of Ujimqin Sheep Identifies Genes Associated with Vertebral Number
Source: Animals (Basel). 2024 Feb 21;14(5):677. doi: 10.3390/ani14050677 (PMC10931107; doi:10.3390/ani14050677)
Supplement: Supplementary file 1 [file animals-14-00677-s001.zip › Table S9.xlsx]

## Sheet: Sheet1
Table S9. The whole-genome high-throughput sequencing data (Gb) of the samples
sample_id	the data of sample
A151139	27.56Gb
A152528	27.99Gb
A152567	28.15Gb
A152572	27.52Gb
A154368	28.31Gb
A162475	29.21Gb
A164219	28.39Gb
A173181	27.69Gb
A173184	30.15Gb
A173195	28.54Gb
A182703	30.65Gb
A182744	27.39Gb
A182753	27.95Gb
A182773	29.34Gb
A182799	31.59Gb
A184287	28.34Gb
A19002	28.94Gb
A19003	27.36Gb
A19022	29.98Gb
A19050	28.59Gb
A19095	28.68Gb
A19110	27.66Gb
A19117	29.32Gb
B151126	31.52Gb
B160991	28.31Gb
B1644	28.69Gb
B173103	28.69Gb
B173130	29.34Gb
B173137	27.95Gb
B174342	27.39Gb
B181302	28.36Gb
B182706	28.74Gb
B182761	29.78Gb
B182772	28.65Gb
B182784	28.64Gb
B182790	28.31Gb
B184286	27.46Gb
B1871	27.34Gb
B19012	28.69Gb
B19039	29.35Gb
B19044	29.66Gb
B19075	28.49Gb
B19082	28.46Gb
B19108	27.34Gb
B19112	27.64Gb
B19118	28.63Gb
C143081	28.11Gb
C150692	29.31Gb
C151003	28.32Gb
C151059	29.34Gb
C152580	29.45Gb
C154336	28.45Gb
C162208	27.13Gb
C162400	28.94Gb
C16407	28.56Gb
C164316	27.31Gb
C164331	27.16Gb
C164366	29.65Gb
C172569	28.36Gb
C173019	28.65Gb
C173139	28.34Gb
C173179	27.18Gb
C174323	27.65Gb
C174350	28.32Gb
C181311	29.11Gb
C181368	28.54Gb
C182741	28.31Gb
C182792	29.31Gb
C19058	27.31Gb
C19076	28.95Gb
C19081	29.15Gb
C19092	28.65Gb
D10000	27.35Gb
D151010	28.64Gb
D151069	27.31Gb
D151101	28.56Gb
D151254	29.31Gb
D152211	28.16Gb
D152225	29.15Gb
D160964	27.46Gb
D164022	28.65Gb
D164102	28.64Gb
D1704035	27.31Gb
D172565	27.55Gb
D173151	28.22Gb
D181372	28.66Gb
D181386	27.32Gb
D182746	27.16Gb
D182764	28.33Gb
D19010	28.56Gb
T2010059074	29.45Gb
T2010059076	28.36Gb
T2010059078	27.45Gb
T2010059079	28.65Gb
T2010059086	28.39Gb
T2010059087	27.46Gb
Averge	28.46Gb
