# Supplementary material for: Whole-Genome Resequencing of Ujimqin Sheep Identifies Genes Associated with Vertebral Number
Source: Animals (Basel). 2024 Feb 21;14(5):677. doi: 10.3390/ani14050677 (PMC10931107; doi:10.3390/ani14050677)
Supplement: Supplementary file 1 [file animals-14-00677-s001.zip › Table S10.xls]

## Sheet: Sheet1
Table S10. The GO enrichment analysis of 40 genes co-expressed with ABCD4
term_type	term ID	term description	observed gene count	background gene count	strength	false discovery rate	matching proteins in your network (IDs)	matching proteins in your network (labels)
CC	GO:0005777	Peroxisome	19	117	1.93	1.29e-28	9940.ENSOARP00000000276,9940.ENSOARP00000000765,9940.ENSOARP00000000825,9940.ENSOARP00000001341,9940.ENSOARP00000001611,9940.ENSOARP00000002897,9940.ENSOARP00000004443,9940.ENSOARP00000004900,9940.ENSOARP00000006435,9940.ENSOARP00000006980,9940.ENSOARP00000008176,9940.ENSOARP00000009212,9940.ENSOARP00000009470,9940.ENSOARP00000012581,9940.ENSOARP00000016897,9940.ENSOARP00000019273,9940.ENSOARP000…	ECI2,HSD17B4,PEX11G,PEX13,PEX3,PEX16,PEX5,SCP2D1,SCP2,HSDL2,ACSL1,PXMP4,CRAT,PEX11A,ACSL6,ACSL4,ACSL3,PEX11B,PEX5L
CC	GO:0005778	Peroxisomal membrane	13	47	2.16	1.23e-21	9940.ENSOARP00000000825,9940.ENSOARP00000001341,9940.ENSOARP00000001611,9940.ENSOARP00000002897,9940.ENSOARP00000004443,9940.ENSOARP00000008176,9940.ENSOARP00000009212,9940.ENSOARP00000012581,9940.ENSOARP00000016897,9940.ENSOARP00000019273,9940.ENSOARP00000021879,9940.ENSOARP00000022172,9940.ENSOARP00000022232	PEX11G,PEX13,PEX3,PEX16,PEX5,ACSL1,PXMP4,PEX11A,ACSL6,ACSL4,ACSL3,PEX11B,PEX5L
CC	GO:0005739	Mitochondrion	21	1563	0.85	2.41e-11	9940.ENSOARP00000000276,9940.ENSOARP00000004443,9940.ENSOARP00000005645,9940.ENSOARP00000006435,9940.ENSOARP00000006633,9940.ENSOARP00000006798,9940.ENSOARP00000006980,9940.ENSOARP00000008176,9940.ENSOARP00000008520,9940.ENSOARP00000008836,9940.ENSOARP00000009470,9940.ENSOARP00000012643,9940.ENSOARP00000015171,9940.ENSOARP00000016754,9940.ENSOARP00000016897,9940.ENSOARP00000018813,9940.ENSOARP000…	ECI2,PEX5,MCCC2,SCP2,CPT2,ACSBG2,HSDL2,ACSL1,PCCB,HADH,CRAT,ACSL5,HTD2,SDHA,ACSL6,ADHFE1,ACSL4,TST,MPST,ACSL3,PEX11B
CC	GO:0005779	Integral component of peroxisomal membrane	6	16	2.29	6e-10	9940.ENSOARP00000000825,9940.ENSOARP00000001341,9940.ENSOARP00000001611,9940.ENSOARP00000002897,9940.ENSOARP00000012581,9940.ENSOARP00000022172	PEX11G,PEX13,PEX3,PEX16,PEX11A,PEX11B
CC	GO:0098805	Whole membrane	16	1273	0.82	1.11e-07	9940.ENSOARP00000000825,9940.ENSOARP00000001073,9940.ENSOARP00000001341,9940.ENSOARP00000001611,9940.ENSOARP00000002897,9940.ENSOARP00000004443,9940.ENSOARP00000004610,9940.ENSOARP00000008176,9940.ENSOARP00000009212,9940.ENSOARP00000012581,9940.ENSOARP00000012643,9940.ENSOARP00000016897,9940.ENSOARP00000019273,9940.ENSOARP00000021879,9940.ENSOARP00000022172,9940.ENSOARP00000022232	PEX11G,ABCD4,PEX13,PEX3,PEX16,PEX5,STOML1,ACSL1,PXMP4,PEX11A,ACSL5,ACSL6,ACSL4,ACSL3,PEX11B,PEX5L
CC	GO:0005737	Cytoplasm	38	11173	0.25	1.39e-06	9940.ENSOARP00000000276,9940.ENSOARP00000000684,9940.ENSOARP00000000765,9940.ENSOARP00000000825,9940.ENSOARP00000001073,9940.ENSOARP00000001341,9940.ENSOARP00000001611,9940.ENSOARP00000001969,9940.ENSOARP00000002239,9940.ENSOARP00000002897,9940.ENSOARP00000004443,9940.ENSOARP00000004610,9940.ENSOARP00000004900,9940.ENSOARP00000005645,9940.ENSOARP00000006435,9940.ENSOARP00000006633,9940.ENSOARP000…	ECI2,ACSBG1,HSD17B4,PEX11G,ABCD4,PEX13,PEX3,WDR48,CHAT,PEX16,PEX5,STOML1,SCP2D1,MCCC2,SCP2,CPT2,ACSBG2,HSDL2,ACSL1,PCCB,HADH,PXMP4,CRAT,PEX11A,ACSL5,CRYL1,HTD2,LRRC47,SDHA,ACSL6,ADHFE1,ACSL4,TST,MPST,FARSB,ACSL3,PEX11B,PEX5L
CC	GO:0098588	Bounding membrane of organelle	16	1621	0.71	2.79e-06	9940.ENSOARP00000000825,9940.ENSOARP00000001073,9940.ENSOARP00000001341,9940.ENSOARP00000001611,9940.ENSOARP00000002897,9940.ENSOARP00000004443,9940.ENSOARP00000004610,9940.ENSOARP00000008176,9940.ENSOARP00000009212,9940.ENSOARP00000012581,9940.ENSOARP00000012643,9940.ENSOARP00000016897,9940.ENSOARP00000019273,9940.ENSOARP00000021879,9940.ENSOARP00000022172,9940.ENSOARP00000022232	PEX11G,ABCD4,PEX13,PEX3,PEX16,PEX5,STOML1,ACSL1,PXMP4,PEX11A,ACSL5,ACSL6,ACSL4,ACSL3,PEX11B,PEX5L
CC	GO:0031090	Organelle membrane	19	3050	0.51	0.00011	9940.ENSOARP00000000825,9940.ENSOARP00000001073,9940.ENSOARP00000001341,9940.ENSOARP00000001611,9940.ENSOARP00000002897,9940.ENSOARP00000004443,9940.ENSOARP00000004610,9940.ENSOARP00000006633,9940.ENSOARP00000008176,9940.ENSOARP00000009212,9940.ENSOARP00000009470,9940.ENSOARP00000012581,9940.ENSOARP00000012643,9940.ENSOARP00000016754,9940.ENSOARP00000016897,9940.ENSOARP00000019273,9940.ENSOARP000…	PEX11G,ABCD4,PEX13,PEX3,PEX16,PEX5,STOML1,CPT2,ACSL1,PXMP4,CRAT,PEX11A,ACSL5,SDHA,ACSL6,ACSL4,ACSL3,PEX11B,PEX5L
CC	GO:0005782	Peroxisomal matrix	3	12	2.12	0.00036	9940.ENSOARP00000000276,9940.ENSOARP00000004443,9940.ENSOARP00000006435	ECI2,PEX5,SCP2
CC	GO:0005741	Mitochondrial outer membrane	5	155	1.23	0.0013	9940.ENSOARP00000008176,9940.ENSOARP00000012643,9940.ENSOARP00000016897,9940.ENSOARP00000019273,9940.ENSOARP00000021879	ACSL1,ACSL5,ACSL6,ACSL4,ACSL3
CC	GO:0043231	Intracellular membrane-bounded organelle	33	10241	0.23	0.0013	9940.ENSOARP00000000276,9940.ENSOARP00000000684,9940.ENSOARP00000000765,9940.ENSOARP00000000825,9940.ENSOARP00000001073,9940.ENSOARP00000001341,9940.ENSOARP00000001611,9940.ENSOARP00000001969,9940.ENSOARP00000002897,9940.ENSOARP00000004443,9940.ENSOARP00000004900,9940.ENSOARP00000005645,9940.ENSOARP00000006435,9940.ENSOARP00000006633,9940.ENSOARP00000006798,9940.ENSOARP00000006980,9940.ENSOARP000…	ECI2,ACSBG1,HSD17B4,PEX11G,ABCD4,PEX13,PEX3,WDR48,PEX16,PEX5,SCP2D1,MCCC2,SCP2,CPT2,ACSBG2,HSDL2,ACSL1,PCCB,HADH,PXMP4,CRAT,PEX11A,ACSL5,HTD2,SDHA,ACSL6,ADHFE1,ACSL4,TST,MPST,ACSL3,PEX11B,PEX5L
CC	GO:0009328	phenylalanine-tRNA ligase complex	2	3	2.54	0.0027	9940.ENSOARP00000016404,9940.ENSOARP00000021833	LRRC47,FARSB
CC	GO:0031966	Mitochondrial membrane	8	685	0.79	0.003	9940.ENSOARP00000006633,9940.ENSOARP00000008176,9940.ENSOARP00000009470,9940.ENSOARP00000012643,9940.ENSOARP00000016754,9940.ENSOARP00000016897,9940.ENSOARP00000019273,9940.ENSOARP00000021879	CPT2,ACSL1,CRAT,ACSL5,SDHA,ACSL6,ACSL4,ACSL3
CC	GO:0043227	Membrane-bounded organelle	34	11390	0.19	0.0031	9940.ENSOARP00000000276,9940.ENSOARP00000000684,9940.ENSOARP00000000765,9940.ENSOARP00000000825,9940.ENSOARP00000001073,9940.ENSOARP00000001341,9940.ENSOARP00000001611,9940.ENSOARP00000001969,9940.ENSOARP00000002897,9940.ENSOARP00000004443,9940.ENSOARP00000004610,9940.ENSOARP00000004900,9940.ENSOARP00000005645,9940.ENSOARP00000006435,9940.ENSOARP00000006633,9940.ENSOARP00000006798,9940.ENSOARP000…	ECI2,ACSBG1,HSD17B4,PEX11G,ABCD4,PEX13,PEX3,WDR48,PEX16,PEX5,STOML1,SCP2D1,MCCC2,SCP2,CPT2,ACSBG2,HSDL2,ACSL1,PCCB,HADH,PXMP4,CRAT,PEX11A,ACSL5,HTD2,SDHA,ACSL6,ADHFE1,ACSL4,TST,MPST,ACSL3,PEX11B,PEX5L
CC	GO:0043229	Intracellular organelle	34	12331	0.16	0.023	9940.ENSOARP00000000276,9940.ENSOARP00000000684,9940.ENSOARP00000000765,9940.ENSOARP00000000825,9940.ENSOARP00000001073,9940.ENSOARP00000001341,9940.ENSOARP00000001611,9940.ENSOARP00000001969,9940.ENSOARP00000002897,9940.ENSOARP00000004443,9940.ENSOARP00000004610,9940.ENSOARP00000004900,9940.ENSOARP00000005645,9940.ENSOARP00000006435,9940.ENSOARP00000006633,9940.ENSOARP00000006798,9940.ENSOARP000…	ECI2,ACSBG1,HSD17B4,PEX11G,ABCD4,PEX13,PEX3,WDR48,PEX16,PEX5,STOML1,SCP2D1,MCCC2,SCP2,CPT2,ACSBG2,HSDL2,ACSL1,PCCB,HADH,PXMP4,CRAT,PEX11A,ACSL5,HTD2,SDHA,ACSL6,ADHFE1,ACSL4,TST,MPST,ACSL3,PEX11B,PEX5L
CC	GO:0005759	Mitochondrial matrix	5	329	0.9	0.0242	9940.ENSOARP00000005645,9940.ENSOARP00000008520,9940.ENSOARP00000008836,9940.ENSOARP00000015171,9940.ENSOARP00000020567	MCCC2,PCCB,HADH,HTD2,TST
MF	GO:0102391	decanoate-CoA ligase activity	7	10	2.56	3.07e-12	9940.ENSOARP00000000684,9940.ENSOARP00000006798,9940.ENSOARP00000008176,9940.ENSOARP00000012643,9940.ENSOARP00000016897,9940.ENSOARP00000019273,9940.ENSOARP00000021879	ACSBG1,ACSBG2,ACSL1,ACSL5,ACSL6,ACSL4,ACSL3
MF	GO:0003996	acyl-CoA ligase activity	7	13	2.45	4.06e-12	9940.ENSOARP00000000684,9940.ENSOARP00000006798,9940.ENSOARP00000008176,9940.ENSOARP00000012643,9940.ENSOARP00000016897,9940.ENSOARP00000019273,9940.ENSOARP00000021879	ACSBG1,ACSBG2,ACSL1,ACSL5,ACSL6,ACSL4,ACSL3
MF	GO:0004467	Long-chain fatty acid-coa ligase activity	7	13	2.45	4.06e-12	9940.ENSOARP00000000684,9940.ENSOARP00000006798,9940.ENSOARP00000008176,9940.ENSOARP00000012643,9940.ENSOARP00000016897,9940.ENSOARP00000019273,9940.ENSOARP00000021879	ACSBG1,ACSBG2,ACSL1,ACSL5,ACSL6,ACSL4,ACSL3
MF	GO:0016874	Ligase activity	11	165	1.54	1.21e-11	9940.ENSOARP00000000684,9940.ENSOARP00000005645,9940.ENSOARP00000006798,9940.ENSOARP00000008176,9940.ENSOARP00000008520,9940.ENSOARP00000012643,9940.ENSOARP00000016404,9940.ENSOARP00000016897,9940.ENSOARP00000019273,9940.ENSOARP00000021833,9940.ENSOARP00000021879	ACSBG1,MCCC2,ACSBG2,ACSL1,PCCB,ACSL5,LRRC47,ACSL6,ACSL4,FARSB,ACSL3
MF	GO:0047676	arachidonate-CoA ligase activity	6	11	2.46	1.5e-10	9940.ENSOARP00000006798,9940.ENSOARP00000008176,9940.ENSOARP00000012643,9940.ENSOARP00000016897,9940.ENSOARP00000019273,9940.ENSOARP00000021879	ACSBG2,ACSL1,ACSL5,ACSL6,ACSL4,ACSL3
MF	GO:0000268	Peroxisome targeting sequence binding	3	5	2.5	9.83e-05	9940.ENSOARP00000001341,9940.ENSOARP00000004443,9940.ENSOARP00000022232	PEX13,PEX5,PEX5L
MF	GO:0003857	3-hydroxyacyl-CoA dehydrogenase activity	3	6	2.42	0.00014	9940.ENSOARP00000000765,9940.ENSOARP00000008836,9940.ENSOARP00000014957	HSD17B4,HADH,CRYL1
MF	GO:0003824	Catalytic activity	26	5910	0.36	0.00035	9940.ENSOARP00000000276,9940.ENSOARP00000000684,9940.ENSOARP00000000765,9940.ENSOARP00000001073,9940.ENSOARP00000002239,9940.ENSOARP00000005645,9940.ENSOARP00000006435,9940.ENSOARP00000006633,9940.ENSOARP00000006798,9940.ENSOARP00000006980,9940.ENSOARP00000008176,9940.ENSOARP00000008520,9940.ENSOARP00000008836,9940.ENSOARP00000009470,9940.ENSOARP00000012643,9940.ENSOARP00000014957,9940.ENSOARP000…	ECI2,ACSBG1,HSD17B4,ABCD4,CHAT,MCCC2,SCP2,CPT2,ACSBG2,HSDL2,ACSL1,PCCB,HADH,CRAT,ACSL5,CRYL1,HTD2,LRRC47,SDHA,ACSL6,ADHFE1,ACSL4,TST,MPST,FARSB,ACSL3
MF	GO:0000166	Nucleotide binding	15	2249	0.54	0.0019	9940.ENSOARP00000000276,9940.ENSOARP00000000684,9940.ENSOARP00000001073,9940.ENSOARP00000005645,9940.ENSOARP00000006798,9940.ENSOARP00000008176,9940.ENSOARP00000008520,9940.ENSOARP00000008836,9940.ENSOARP00000012643,9940.ENSOARP00000014957,9940.ENSOARP00000016754,9940.ENSOARP00000016897,9940.ENSOARP00000019273,9940.ENSOARP00000021833,9940.ENSOARP00000021879	ECI2,ACSBG1,ABCD4,MCCC2,ACSBG2,ACSL1,PCCB,HADH,ACSL5,CRYL1,SDHA,ACSL6,ACSL4,FARSB,ACSL3
MF	GO:0005052	Peroxisome matrix targeting signal-1 binding	2	2	2.72	0.004	9940.ENSOARP00000004443,9940.ENSOARP00000022232	PEX5,PEX5L
MF	GO:0032559	Adenyl ribonucleotide binding	12	1627	0.59	0.0063	9940.ENSOARP00000000276,9940.ENSOARP00000000684,9940.ENSOARP00000001073,9940.ENSOARP00000005645,9940.ENSOARP00000006798,9940.ENSOARP00000008176,9940.ENSOARP00000008520,9940.ENSOARP00000012643,9940.ENSOARP00000016897,9940.ENSOARP00000019273,9940.ENSOARP00000021833,9940.ENSOARP00000021879	ECI2,ACSBG1,ABCD4,MCCC2,ACSBG2,ACSL1,PCCB,ACSL5,ACSL6,ACSL4,FARSB,ACSL3
MF	GO:0004792	Thiosulfate sulfurtransferase activity	2	4	2.42	0.0082	9940.ENSOARP00000020567,9940.ENSOARP00000020588	TST,MPST
MF	GO:0004826	phenylalanine-tRNA ligase activity	2	4	2.42	0.0082	9940.ENSOARP00000016404,9940.ENSOARP00000021833	LRRC47,FARSB
MF	GO:0016406	Carnitine o-acyltransferase activity	2	6	2.24	0.013	9940.ENSOARP00000006633,9940.ENSOARP00000009470	CPT2,CRAT
MF	GO:0016421	CoA carboxylase activity	2	6	2.24	0.013	9940.ENSOARP00000005645,9940.ENSOARP00000008520	MCCC2,PCCB
MF	GO:0018812	3-hydroxyacyl-CoA dehydratase activity	2	6	2.24	0.013	9940.ENSOARP00000000765,9940.ENSOARP00000015171	HSD17B4,HTD2
MF	GO:0005524	ATP binding	11	1579	0.56	0.0147	9940.ENSOARP00000000684,9940.ENSOARP00000001073,9940.ENSOARP00000005645,9940.ENSOARP00000006798,9940.ENSOARP00000008176,9940.ENSOARP00000008520,9940.ENSOARP00000012643,9940.ENSOARP00000016897,9940.ENSOARP00000019273,9940.ENSOARP00000021833,9940.ENSOARP00000021879	ACSBG1,ABCD4,MCCC2,ACSBG2,ACSL1,PCCB,ACSL5,ACSL6,ACSL4,FARSB,ACSL3
MF	GO:0016413	O-acetyltransferase activity	2	7	2.17	0.0147	9940.ENSOARP00000002239,9940.ENSOARP00000009470	CHAT,CRAT
MF	GO:0008374	O-acyltransferase activity	3	53	1.47	0.0173	9940.ENSOARP00000002239,9940.ENSOARP00000006633,9940.ENSOARP00000009470	CHAT,CPT2,CRAT
MF	GO:0043168	Anion binding	15	2919	0.43	0.0189	9940.ENSOARP00000000276,9940.ENSOARP00000000684,9940.ENSOARP00000001073,9940.ENSOARP00000005645,9940.ENSOARP00000006798,9940.ENSOARP00000008176,9940.ENSOARP00000008520,9940.ENSOARP00000008836,9940.ENSOARP00000012643,9940.ENSOARP00000014957,9940.ENSOARP00000016754,9940.ENSOARP00000016897,9940.ENSOARP00000019273,9940.ENSOARP00000021833,9940.ENSOARP00000021879	ECI2,ACSBG1,ABCD4,MCCC2,ACSBG2,ACSL1,PCCB,HADH,ACSL5,CRYL1,SDHA,ACSL6,ACSL4,FARSB,ACSL3
MF	GO:0016616	Oxidoreductase activity, acting on the ch-oh group of donors, nad or nadp as acceptor	4	166	1.1	0.0262	9940.ENSOARP00000000765,9940.ENSOARP00000008836,9940.ENSOARP00000014957,9940.ENSOARP00000018813	HSD17B4,HADH,CRYL1,ADHFE1
MF	GO:0070403	NAD+ binding	2	13	1.91	0.03	9940.ENSOARP00000008836,9940.ENSOARP00000014957	HADH,CRYL1
BP	GO:0019752	Carboxylic acid metabolic process	24	721	1.24	4.67e-21	9940.ENSOARP00000000276,9940.ENSOARP00000000684,9940.ENSOARP00000000765,9940.ENSOARP00000001341,9940.ENSOARP00000004443,9940.ENSOARP00000005645,9940.ENSOARP00000006435,9940.ENSOARP00000006633,9940.ENSOARP00000006798,9940.ENSOARP00000008176,9940.ENSOARP00000008520,9940.ENSOARP00000008836,9940.ENSOARP00000009470,9940.ENSOARP00000012643,9940.ENSOARP00000014957,9940.ENSOARP00000015171,9940.ENSOARP000…	ECI2,ACSBG1,HSD17B4,PEX13,PEX5,MCCC2,SCP2,CPT2,ACSBG2,ACSL1,PCCB,HADH,CRAT,ACSL5,CRYL1,HTD2,LRRC47,ACSL6,ADHFE1,ACSL4,TST,MPST,FARSB,ACSL3
BP	GO:0006631	Fatty acid metabolic process	18	276	1.53	6.22e-20	9940.ENSOARP00000000276,9940.ENSOARP00000000684,9940.ENSOARP00000000765,9940.ENSOARP00000001341,9940.ENSOARP00000004443,9940.ENSOARP00000006435,9940.ENSOARP00000006633,9940.ENSOARP00000006798,9940.ENSOARP00000008176,9940.ENSOARP00000008520,9940.ENSOARP00000008836,9940.ENSOARP00000009470,9940.ENSOARP00000012643,9940.ENSOARP00000014957,9940.ENSOARP00000015171,9940.ENSOARP00000016897,9940.ENSOARP000…	ECI2,ACSBG1,HSD17B4,PEX13,PEX5,SCP2,CPT2,ACSBG2,ACSL1,PCCB,HADH,CRAT,ACSL5,CRYL1,HTD2,ACSL6,ACSL4,ACSL3
BP	GO:0044281	Small molecule metabolic process	25	1474	0.95	4.93e-16	9940.ENSOARP00000000276,9940.ENSOARP00000000684,9940.ENSOARP00000000765,9940.ENSOARP00000001073,9940.ENSOARP00000001341,9940.ENSOARP00000004443,9940.ENSOARP00000005645,9940.ENSOARP00000006435,9940.ENSOARP00000006633,9940.ENSOARP00000006798,9940.ENSOARP00000008176,9940.ENSOARP00000008520,9940.ENSOARP00000008836,9940.ENSOARP00000009470,9940.ENSOARP00000012643,9940.ENSOARP00000014957,9940.ENSOARP000…	ECI2,ACSBG1,HSD17B4,ABCD4,PEX13,PEX5,MCCC2,SCP2,CPT2,ACSBG2,ACSL1,PCCB,HADH,CRAT,ACSL5,CRYL1,HTD2,LRRC47,ACSL6,ADHFE1,ACSL4,TST,MPST,FARSB,ACSL3
BP	GO:0007031	Peroxisome organization	8	28	2.17	3.35e-12	9940.ENSOARP00000000825,9940.ENSOARP00000001341,9940.ENSOARP00000001611,9940.ENSOARP00000002897,9940.ENSOARP00000004443,9940.ENSOARP00000012581,9940.ENSOARP00000022172,9940.ENSOARP00000022232	PEX11G,PEX13,PEX3,PEX16,PEX5,PEX11A,PEX11B,PEX5L
BP	GO:0006629	Lipid metabolic process	19	1004	1	6.23e-12	9940.ENSOARP00000000276,9940.ENSOARP00000000684,9940.ENSOARP00000000765,9940.ENSOARP00000001341,9940.ENSOARP00000004443,9940.ENSOARP00000004900,9940.ENSOARP00000006435,9940.ENSOARP00000006633,9940.ENSOARP00000006798,9940.ENSOARP00000008176,9940.ENSOARP00000008520,9940.ENSOARP00000008836,9940.ENSOARP00000009470,9940.ENSOARP00000012643,9940.ENSOARP00000014957,9940.ENSOARP00000015171,9940.ENSOARP000…	ECI2,ACSBG1,HSD17B4,PEX13,PEX5,SCP2D1,SCP2,CPT2,ACSBG2,ACSL1,PCCB,HADH,CRAT,ACSL5,CRYL1,HTD2,ACSL6,ACSL4,ACSL3
BP	GO:0009062	Fatty acid catabolic process	9	74	1.8	4.19e-11	9940.ENSOARP00000000276,9940.ENSOARP00000000765,9940.ENSOARP00000001341,9940.ENSOARP00000004443,9940.ENSOARP00000006435,9940.ENSOARP00000006633,9940.ENSOARP00000008520,9940.ENSOARP00000008836,9940.ENSOARP00000009470	ECI2,HSD17B4,PEX13,PEX5,SCP2,CPT2,PCCB,HADH,CRAT
BP	GO:0035337	fatty-acyl-CoA metabolic process	7	22	2.22	8.04e-11	9940.ENSOARP00000000765,9940.ENSOARP00000008176,9940.ENSOARP00000012643,9940.ENSOARP00000015171,9940.ENSOARP00000016897,9940.ENSOARP00000019273,9940.ENSOARP00000021879	HSD17B4,ACSL1,ACSL5,HTD2,ACSL6,ACSL4,ACSL3
BP	GO:0046395	Carboxylic acid catabolic process	11	204	1.45	1.68e-10	9940.ENSOARP00000000276,9940.ENSOARP00000000765,9940.ENSOARP00000001341,9940.ENSOARP00000004443,9940.ENSOARP00000005645,9940.ENSOARP00000006435,9940.ENSOARP00000006633,9940.ENSOARP00000008520,9940.ENSOARP00000008836,9940.ENSOARP00000009470,9940.ENSOARP00000018813	ECI2,HSD17B4,PEX13,PEX5,MCCC2,SCP2,CPT2,PCCB,HADH,CRAT,ADHFE1
BP	GO:0019395	Fatty acid oxidation	8	63	1.82	5.99e-10	9940.ENSOARP00000000276,9940.ENSOARP00000000765,9940.ENSOARP00000001341,9940.ENSOARP00000004443,9940.ENSOARP00000006435,9940.ENSOARP00000006633,9940.ENSOARP00000008836,9940.ENSOARP00000009470	ECI2,HSD17B4,PEX13,PEX5,SCP2,CPT2,HADH,CRAT
BP	GO:0006635	Fatty acid beta-oxidation	7	48	1.88	5.84e-09	9940.ENSOARP00000000276,9940.ENSOARP00000000765,9940.ENSOARP00000004443,9940.ENSOARP00000006435,9940.ENSOARP00000006633,9940.ENSOARP00000008836,9940.ENSOARP00000009470	ECI2,HSD17B4,PEX5,SCP2,CPT2,HADH,CRAT
BP	GO:0033875	Ribonucleoside bisphosphate metabolic process	8	87	1.68	5.84e-09	9940.ENSOARP00000000765,9940.ENSOARP00000005645,9940.ENSOARP00000008176,9940.ENSOARP00000012643,9940.ENSOARP00000015171,9940.ENSOARP00000016897,9940.ENSOARP00000019273,9940.ENSOARP00000021879	HSD17B4,MCCC2,ACSL1,ACSL5,HTD2,ACSL6,ACSL4,ACSL3
BP	GO:0034032	Purine nucleoside bisphosphate metabolic process	8	87	1.68	5.84e-09	9940.ENSOARP00000000765,9940.ENSOARP00000005645,9940.ENSOARP00000008176,9940.ENSOARP00000012643,9940.ENSOARP00000015171,9940.ENSOARP00000016897,9940.ENSOARP00000019273,9940.ENSOARP00000021879	HSD17B4,MCCC2,ACSL1,ACSL5,HTD2,ACSL6,ACSL4,ACSL3
BP	GO:0046949	fatty-acyl-CoA biosynthetic process	5	13	2.3	6.97e-08	9940.ENSOARP00000008176,9940.ENSOARP00000012643,9940.ENSOARP00000015171,9940.ENSOARP00000016897,9940.ENSOARP00000019273	ACSL1,ACSL5,HTD2,ACSL6,ACSL4
BP	GO:0035336	Long-chain fatty-acyl-coa metabolic process	5	16	2.21	1.59e-07	9940.ENSOARP00000008176,9940.ENSOARP00000012643,9940.ENSOARP00000016897,9940.ENSOARP00000019273,9940.ENSOARP00000021879	ACSL1,ACSL5,ACSL6,ACSL4,ACSL3
BP	GO:0006625	Protein targeting to peroxisome	5	17	2.19	1.98e-07	9940.ENSOARP00000001341,9940.ENSOARP00000001611,9940.ENSOARP00000002897,9940.ENSOARP00000004443,9940.ENSOARP00000022232	PEX13,PEX3,PEX16,PEX5,PEX5L
BP	GO:0015919	Peroxisomal membrane transport	5	17	2.19	1.98e-07	9940.ENSOARP00000001341,9940.ENSOARP00000001611,9940.ENSOARP00000002897,9940.ENSOARP00000004443,9940.ENSOARP00000022232	PEX13,PEX3,PEX16,PEX5,PEX5L
BP	GO:0006790	Sulfur compound metabolic process	9	239	1.29	2.69e-07	9940.ENSOARP00000000765,9940.ENSOARP00000008176,9940.ENSOARP00000012643,9940.ENSOARP00000015171,9940.ENSOARP00000016897,9940.ENSOARP00000019273,9940.ENSOARP00000020567,9940.ENSOARP00000020588,9940.ENSOARP00000021879	HSD17B4,ACSL1,ACSL5,HTD2,ACSL6,ACSL4,TST,MPST,ACSL3
BP	GO:0035338	Long-chain fatty-acyl-coa biosynthetic process	4	10	2.32	3.18e-06	9940.ENSOARP00000008176,9940.ENSOARP00000012643,9940.ENSOARP00000016897,9940.ENSOARP00000019273	ACSL1,ACSL5,ACSL6,ACSL4
BP	GO:0009150	Purine ribonucleotide metabolic process	8	263	1.2	9.72e-06	9940.ENSOARP00000000765,9940.ENSOARP00000005645,9940.ENSOARP00000008176,9940.ENSOARP00000012643,9940.ENSOARP00000015171,9940.ENSOARP00000016897,9940.ENSOARP00000019273,9940.ENSOARP00000021879	HSD17B4,MCCC2,ACSL1,ACSL5,HTD2,ACSL6,ACSL4,ACSL3
BP	GO:0044272	Sulfur compound biosynthetic process	6	99	1.5	1.15e-05	9940.ENSOARP00000008176,9940.ENSOARP00000012643,9940.ENSOARP00000015171,9940.ENSOARP00000016897,9940.ENSOARP00000019273,9940.ENSOARP00000020588	ACSL1,ACSL5,HTD2,ACSL6,ACSL4,MPST
BP	GO:0008610	Lipid biosynthetic process	9	418	1.05	1.96e-05	9940.ENSOARP00000000684,9940.ENSOARP00000004900,9940.ENSOARP00000006435,9940.ENSOARP00000006798,9940.ENSOARP00000008176,9940.ENSOARP00000012643,9940.ENSOARP00000016897,9940.ENSOARP00000019273,9940.ENSOARP00000021879	ACSBG1,SCP2D1,SCP2,ACSBG2,ACSL1,ACSL5,ACSL6,ACSL4,ACSL3
BP	GO:0044375	Regulation of peroxisome size	3	3	2.72	2.83e-05	9940.ENSOARP00000000825,9940.ENSOARP00000012581,9940.ENSOARP00000022172	PEX11G,PEX11A,PEX11B
BP	GO:0016560	Protein import into peroxisome matrix, docking	3	4	2.59	4.76e-05	9940.ENSOARP00000001341,9940.ENSOARP00000004443,9940.ENSOARP00000022232	PEX13,PEX5,PEX5L
BP	GO:0055114	Oxidation-reduction process	12	1025	0.79	6.49e-05	9940.ENSOARP00000000276,9940.ENSOARP00000000765,9940.ENSOARP00000001341,9940.ENSOARP00000004443,9940.ENSOARP00000006435,9940.ENSOARP00000006633,9940.ENSOARP00000006980,9940.ENSOARP00000008836,9940.ENSOARP00000009470,9940.ENSOARP00000014957,9940.ENSOARP00000016754,9940.ENSOARP00000018813	ECI2,HSD17B4,PEX13,PEX5,SCP2,CPT2,HSDL2,HADH,CRAT,CRYL1,SDHA,ADHFE1
BP	GO:0032368	Regulation of lipid transport	5	75	1.54	8.48e-05	9940.ENSOARP00000004900,9940.ENSOARP00000006435,9940.ENSOARP00000012643,9940.ENSOARP00000016897,9940.ENSOARP00000019273	SCP2D1,SCP2,ACSL5,ACSL6,ACSL4
BP	GO:0016559	Peroxisome fission	3	6	2.42	0.0001	9940.ENSOARP00000000825,9940.ENSOARP00000012581,9940.ENSOARP00000022172	PEX11G,PEX11A,PEX11B
BP	GO:0032370	Positive regulation of lipid transport	4	48	1.64	0.00053	9940.ENSOARP00000004900,9940.ENSOARP00000006435,9940.ENSOARP00000012643,9940.ENSOARP00000016897	SCP2D1,SCP2,ACSL5,ACSL6
BP	GO:2000191	Regulation of fatty acid transport	3	14	2.05	0.00076	9940.ENSOARP00000012643,9940.ENSOARP00000016897,9940.ENSOARP00000019273	ACSL5,ACSL6,ACSL4
BP	GO:0044237	Cellular metabolic process	28	7184	0.31	0.00082	9940.ENSOARP00000000276,9940.ENSOARP00000000684,9940.ENSOARP00000000765,9940.ENSOARP00000001073,9940.ENSOARP00000001341,9940.ENSOARP00000001969,9940.ENSOARP00000002239,9940.ENSOARP00000004443,9940.ENSOARP00000005645,9940.ENSOARP00000006435,9940.ENSOARP00000006633,9940.ENSOARP00000006798,9940.ENSOARP00000008176,9940.ENSOARP00000008520,9940.ENSOARP00000008836,9940.ENSOARP00000009470,9940.ENSOARP000…	ECI2,ACSBG1,HSD17B4,ABCD4,PEX13,WDR48,CHAT,PEX5,MCCC2,SCP2,CPT2,ACSBG2,ACSL1,PCCB,HADH,CRAT,ACSL5,CRYL1,HTD2,LRRC47,SDHA,ACSL6,ADHFE1,ACSL4,TST,MPST,FARSB,ACSL3
BP	GO:0017038	Protein import	5	127	1.31	0.00087	9940.ENSOARP00000001341,9940.ENSOARP00000001611,9940.ENSOARP00000002897,9940.ENSOARP00000004443,9940.ENSOARP00000022232	PEX13,PEX3,PEX16,PEX5,PEX5L
BP	GO:0006520	Cellular amino acid metabolic process	6	239	1.12	0.0011	9940.ENSOARP00000005645,9940.ENSOARP00000016404,9940.ENSOARP00000018813,9940.ENSOARP00000020567,9940.ENSOARP00000020588,9940.ENSOARP00000021833	MCCC2,LRRC47,ADHFE1,TST,MPST,FARSB
BP	GO:0008152	Metabolic process	30	8320	0.28	0.0011	9940.ENSOARP00000000276,9940.ENSOARP00000000684,9940.ENSOARP00000000765,9940.ENSOARP00000001073,9940.ENSOARP00000001341,9940.ENSOARP00000001969,9940.ENSOARP00000002239,9940.ENSOARP00000004443,9940.ENSOARP00000004900,9940.ENSOARP00000005645,9940.ENSOARP00000006435,9940.ENSOARP00000006633,9940.ENSOARP00000006798,9940.ENSOARP00000006980,9940.ENSOARP00000008176,9940.ENSOARP00000008520,9940.ENSOARP000…	ECI2,ACSBG1,HSD17B4,ABCD4,PEX13,WDR48,CHAT,PEX5,SCP2D1,MCCC2,SCP2,CPT2,ACSBG2,HSDL2,ACSL1,PCCB,HADH,CRAT,ACSL5,CRYL1,HTD2,LRRC47,SDHA,ACSL6,ADHFE1,ACSL4,TST,MPST,FARSB,ACSL3
BP	GO:0044248	Cellular catabolic process	12	1479	0.63	0.0021	9940.ENSOARP00000000276,9940.ENSOARP00000000765,9940.ENSOARP00000001341,9940.ENSOARP00000004443,9940.ENSOARP00000005645,9940.ENSOARP00000006435,9940.ENSOARP00000006633,9940.ENSOARP00000008176,9940.ENSOARP00000008520,9940.ENSOARP00000008836,9940.ENSOARP00000009470,9940.ENSOARP00000018813	ECI2,HSD17B4,PEX13,PEX5,MCCC2,SCP2,CPT2,ACSL1,PCCB,HADH,CRAT,ADHFE1
BP	GO:0071704	Organic substance metabolic process	28	7618	0.28	0.0025	9940.ENSOARP00000000276,9940.ENSOARP00000000684,9940.ENSOARP00000000765,9940.ENSOARP00000001073,9940.ENSOARP00000001341,9940.ENSOARP00000001969,9940.ENSOARP00000002239,9940.ENSOARP00000004443,9940.ENSOARP00000004900,9940.ENSOARP00000005645,9940.ENSOARP00000006435,9940.ENSOARP00000006633,9940.ENSOARP00000006798,9940.ENSOARP00000008176,9940.ENSOARP00000008520,9940.ENSOARP00000008836,9940.ENSOARP000…	ECI2,ACSBG1,HSD17B4,ABCD4,PEX13,WDR48,CHAT,PEX5,SCP2D1,MCCC2,SCP2,CPT2,ACSBG2,ACSL1,PCCB,HADH,CRAT,ACSL5,CRYL1,HTD2,LRRC47,ACSL6,ADHFE1,ACSL4,TST,MPST,FARSB,ACSL3
BP	GO:0044238	Primary metabolic process	27	7148	0.3	0.0026	9940.ENSOARP00000000276,9940.ENSOARP00000000684,9940.ENSOARP00000000765,9940.ENSOARP00000001341,9940.ENSOARP00000001969,9940.ENSOARP00000004443,9940.ENSOARP00000004900,9940.ENSOARP00000005645,9940.ENSOARP00000006435,9940.ENSOARP00000006633,9940.ENSOARP00000006798,9940.ENSOARP00000008176,9940.ENSOARP00000008520,9940.ENSOARP00000008836,9940.ENSOARP00000009470,9940.ENSOARP00000012643,9940.ENSOARP000…	ECI2,ACSBG1,HSD17B4,PEX13,WDR48,PEX5,SCP2D1,MCCC2,SCP2,CPT2,ACSBG2,ACSL1,PCCB,HADH,CRAT,ACSL5,CRYL1,HTD2,LRRC47,SDHA,ACSL6,ADHFE1,ACSL4,TST,MPST,FARSB,ACSL3
BP	GO:0006869	Lipid transport	6	315	1	0.0044	9940.ENSOARP00000004610,9940.ENSOARP00000004900,9940.ENSOARP00000006435,9940.ENSOARP00000008176,9940.ENSOARP00000019273,9940.ENSOARP00000021879	STOML1,SCP2D1,SCP2,ACSL1,ACSL4,ACSL3
BP	GO:0000038	Very long-chain fatty acid metabolic process	3	30	1.72	0.0048	9940.ENSOARP00000000765,9940.ENSOARP00000004443,9940.ENSOARP00000008176	HSD17B4,PEX5,ACSL1
BP	GO:0019346	Transsulfuration	2	3	2.54	0.005	9940.ENSOARP00000020567,9940.ENSOARP00000020588	TST,MPST
BP	GO:0043603	Cellular amide metabolic process	9	888	0.72	0.0052	9940.ENSOARP00000000765,9940.ENSOARP00000008176,9940.ENSOARP00000012643,9940.ENSOARP00000015171,9940.ENSOARP00000016404,9940.ENSOARP00000016897,9940.ENSOARP00000019273,9940.ENSOARP00000021833,9940.ENSOARP00000021879	HSD17B4,ACSL1,ACSL5,HTD2,LRRC47,ACSL6,ACSL4,FARSB,ACSL3
BP	GO:0071702	Organic substance transport	13	1931	0.55	0.0053	9940.ENSOARP00000001341,9940.ENSOARP00000001611,9940.ENSOARP00000002897,9940.ENSOARP00000004443,9940.ENSOARP00000004610,9940.ENSOARP00000004900,9940.ENSOARP00000006435,9940.ENSOARP00000008176,9940.ENSOARP00000019273,9940.ENSOARP00000020567,9940.ENSOARP00000021879,9940.ENSOARP00000022110,9940.ENSOARP00000022232	PEX13,PEX3,PEX16,PEX5,STOML1,SCP2D1,SCP2,ACSL1,ACSL4,TST,ACSL3,SLC19A3,PEX5L
BP	GO:0006432	phenylalanyl-tRNA aminoacylation	2	4	2.42	0.0066	9940.ENSOARP00000016404,9940.ENSOARP00000021833	LRRC47,FARSB
BP	GO:0010746	Regulation of long-chain fatty acid import across plasma membrane	2	4	2.42	0.0066	9940.ENSOARP00000012643,9940.ENSOARP00000016897	ACSL5,ACSL6
BP	GO:0032385	Positive regulation of intracellular cholesterol transport	2	4	2.42	0.0066	9940.ENSOARP00000004900,9940.ENSOARP00000006435	SCP2D1,SCP2
BP	GO:0045046	Protein import into peroxisome membrane	2	4	2.42	0.0066	9940.ENSOARP00000001611,9940.ENSOARP00000002897	PEX3,PEX16
BP	GO:1903961	Positive regulation of anion transmembrane transport	2	5	2.32	0.0084	9940.ENSOARP00000012643,9940.ENSOARP00000016897	ACSL5,ACSL6
BP	GO:0009058	Biosynthetic process	14	2411	0.48	0.0103	9940.ENSOARP00000000684,9940.ENSOARP00000002239,9940.ENSOARP00000004900,9940.ENSOARP00000006435,9940.ENSOARP00000006798,9940.ENSOARP00000008176,9940.ENSOARP00000012643,9940.ENSOARP00000015171,9940.ENSOARP00000016404,9940.ENSOARP00000016897,9940.ENSOARP00000019273,9940.ENSOARP00000020588,9940.ENSOARP00000021833,9940.ENSOARP00000021879	ACSBG1,CHAT,SCP2D1,SCP2,ACSBG2,ACSL1,ACSL5,HTD2,LRRC47,ACSL6,ACSL4,MPST,FARSB,ACSL3
BP	GO:0046459	Short-chain fatty acid metabolic process	2	8	2.12	0.0166	9940.ENSOARP00000008520,9940.ENSOARP00000009470	PCCB,CRAT
BP	GO:2000193	Positive regulation of fatty acid transport	2	8	2.12	0.0166	9940.ENSOARP00000012643,9940.ENSOARP00000016897	ACSL5,ACSL6
BP	GO:0051050	Positive regulation of transport	7	655	0.75	0.0231	9940.ENSOARP00000001920,9940.ENSOARP00000004900,9940.ENSOARP00000006435,9940.ENSOARP00000012643,9940.ENSOARP00000016897,9940.ENSOARP00000019273,9940.ENSOARP00000021879	KIAA0100,SCP2D1,SCP2,ACSL5,ACSL6,ACSL4,ACSL3
BP	GO:0044539	Long-chain fatty acid import into cell	2	10	2.02	0.0232	9940.ENSOARP00000008176,9940.ENSOARP00000021879	ACSL1,ACSL3
BP	GO:0007584	Response to nutrient	3	62	1.4	0.0253	9940.ENSOARP00000008176,9940.ENSOARP00000019273,9940.ENSOARP00000021879	ACSL1,ACSL4,ACSL3
BP	GO:1901605	Alpha-amino acid metabolic process	4	162	1.11	0.0266	9940.ENSOARP00000005645,9940.ENSOARP00000018813,9940.ENSOARP00000020567,9940.ENSOARP00000020588	MCCC2,ADHFE1,TST,MPST
BP	GO:0043604	Amide biosynthetic process	7	679	0.73	0.027	9940.ENSOARP00000008176,9940.ENSOARP00000012643,9940.ENSOARP00000015171,9940.ENSOARP00000016404,9940.ENSOARP00000016897,9940.ENSOARP00000019273,9940.ENSOARP00000021833	ACSL1,ACSL5,HTD2,LRRC47,ACSL6,ACSL4,FARSB
BP	GO:1901576	Organic substance biosynthetic process	13	2352	0.46	0.0276	9940.ENSOARP00000000684,9940.ENSOARP00000002239,9940.ENSOARP00000004900,9940.ENSOARP00000006435,9940.ENSOARP00000006798,9940.ENSOARP00000008176,9940.ENSOARP00000012643,9940.ENSOARP00000015171,9940.ENSOARP00000016404,9940.ENSOARP00000016897,9940.ENSOARP00000019273,9940.ENSOARP00000021833,9940.ENSOARP00000021879	ACSBG1,CHAT,SCP2D1,SCP2,ACSBG2,ACSL1,ACSL5,HTD2,LRRC47,ACSL6,ACSL4,FARSB,ACSL3
